# Supplementary material for: Expectation maximization—vector approximate message passing based generalized linear model for channel estimation in intelligent reflecting surface-assisted millimeter multi-user multiple-input multiple-output systems
Source: PeerJ journal article supplement (doi:10.7717/peerj-cs.2582), 2025-01-03
Supplement: Generation.xlsx [file Generation.xlsx]

## Sheet: Sheet1
0.00167965733456722 - 0.000482422916203909i	0.000728696048110907 + 0.00131232552538888i	-0.000689646740139483 + 0.00107374406640742i	-0.00151905625684491 - 0.00114937956240240i	-0.00105844809358713 + 0.000549807140905604i	0.000796242001214013 - 0.000618128503181860i	0.00175375840462336 - 0.00235178848167167i	0.000503927160434535 + 0.00165520704903391i	-0.000846547280989292 + 0.00194495491993712i	-0.000794576123710452 - 0.000523693727834452i	-0.000320066180686701 + 0.000436636633797283i	-0.000205811836459188 - 0.00151812551390785i	0.000202322975877059 - 0.00218576565366473i	0.00113759769355943 + 0.00204791941735577i	0.00102245512659986 + 0.00149028653719847i	-0.000697600155735528 - 0.000454996002148511i	-0.00105655923135286 - 0.000102682656048648i	0.00127159075255503 - 0.000134669429611359i	0.00153210462789999 - 0.00164485964802835i	0.000740777088311470 + 0.00139296404385991i	-0.000969952809611262 + 0.00162665882539398i	-0.00158593955569650 - 0.000612307170564956i	0.000100588732607744 + 0.000481759430719464i	0.000361794573128340 - 0.00131585486054018i	0.000101751913111593 - 0.00241175063021445i	0.00126198698968897 + 0.00202372086933769i	0.000393182231886597 + 0.00205157381827757i	-0.00112949217643502 - 0.000588556266760340i	-0.000667735662810939 - 1.23459163128846e-05i	-0.000716663026628246 - 0.00132064197032660i	3.59899709589586e-05 - 0.00115180104333762i	0.00206953274626090 + 0.00148807794706510i	-0.000667458148634534 + 0.00112526244307951i	-0.00230743802231930 - 0.000586976923518035i	0.000112081316329647 + 0.000316184408891615i	0.00107068893985973 - 0.00106400589185404i	0.000155127024199904 - 0.00215303249842947i	0.00122423189389211 + 0.00171135868963918i	-0.000137433922768299 + 0.00222086767842411i	-0.00164537274151586 - 0.000431311352717699i	0.000204070911992302 - 0.000403986281209644i	-0.000370629969780343 - 0.00134851485973625i	-0.000581481994261512 - 0.00121688888086355i	0.00231639566779940 + 0.00158843834153815i	0.00102674912449271 + 0.000908804909920621i	-0.00171228943257624 - 0.000130959504969471i	-0.00109355011834651 + 0.000614696194014364i	-0.000820366063424055 - 0.00112590355113828i	0.000340839120022857 - 0.00139807516209138i	0.00103703804069511 + 0.00128218959216667i
0.000998345287997428 - 0.000936915634523151i	0.00112550068899221 + 0.000324145359507442i	0.00123349732998230 - 0.000184813778815414i	-0.00148187182445352 + 0.00153165640274481i	-0.00136875601271017 + 0.00133749027517714i	0.000760238892280242 - 0.00155941466747199i	-0.000616733695529403 - 0.00129778955104861i	0.000181550255408422 - 0.000567547772923230i	0.00206319900845992 + 0.000244667402276709i	-0.000323214616570387 + 0.00248069208785380i	-0.000942503781262192 + 0.000481367213199637i	-0.000279978986603053 - 0.00200134101483109i	-0.00160096214260203 - 3.94226576383537e-05i	0.000600491504888956 - 0.000197368001018137i	0.00262675974824181 - 0.000882031280899300i	4.97983712448096e-05 + 0.00143394003135378i	-0.00153338811604418 + 0.00160755829516212i	0.000256387893646271 - 0.00167574961075398i	0.000279461052034195 - 0.00131057099931902i	0.000699051834115008 - 0.000227461577580994i	0.00117726951972644 + 8.70636822948844e-06i	-0.000583016234388546 + 0.00257467527499250i	-0.000814441905452927 + 0.000791815672484818i	-0.000167987575250175 - 0.00249252125107892i	-0.00108808910478454 - 0.000281710699902424i	0.000346416255682171 - 7.08397377862019e-06i	0.00226817789261740 - 0.000679462110548848i	0.000492759162950895 + 0.00202802203130821i	-0.00126109614417485 + 0.000659520118048017i	-0.00144839190105574 - 0.00133669412010926i	-0.000790884929547764 + 0.000540749493408658i	0.00136520369100131 - 0.000920117692032833i	0.000269786467188960 - 0.000181873629566121i	-0.000909540664672053 + 0.00219478116183449i	-0.000600106362062677 + 0.00116357755637698i	-0.000262596062883225 - 0.00253752363547119i	-0.000439646957619187 - 0.000728556756256316i	0.000440273727898779 + 9.31618361388951e-05i	0.00151026483499270 - 0.000346840057859997i	0.000677189129196742 + 0.00240323040388121i	-0.00114709656762708 + 0.000535084052558861i	-0.00167703176015607 - 0.00216193044061741i	-0.000409899670656258 + 0.000526177011874088i	0.00118233223660961 - 0.000261665319946165i	0.00148068687303898 - 0.00156696451769680i	0.000426307354238676 + 0.00169195114404054i	-0.000982493297211813 + 0.00124679296756781i	-0.00144562351058283 - 0.000281734033386305i	0.000215638841706333 - 0.00118821736290130i	0.000911462815370979 + 9.48836290785293e-05i
-0.00154296384625388 - 0.000713234843927937i	0.00167222898918848 - 0.00186772220534449i	0.000700897596568556 - 0.000796423710781011i	-0.000387309859228145 + 0.00151591775091631i	0.00129822167967055 + 0.00177291760505894i	-0.00106170278137911 - 5.32331946667918e-05i	-0.00179175468620720 - 0.00108800066616586i	0.000618602972337150 - 0.000892557005476960i	-3.88952728547255e-05 - 0.000415646286176275i	0.00134825301496692 + 0.000420551573046728i	0.00212575706585282 + 0.000964369463993445i	-0.00247352464421468 + 0.000571613303354899i	-0.00203821519042884 - 3.07485175226491e-05i	0.00130562297061215 - 0.000543953379700684i	-3.82827077709045e-05 - 0.00103807680048648i	0.000891626262539899 - 0.000736588426524435i	0.000614153335055063 + 0.00119851225287618i	-0.000677840162915748 + 0.000205751158577368i	-0.00152749147150490 - 0.000766114482744022i	0.000698689006435190 - 0.00184350133044206i	0.000170368798969015 - 0.000238241636172083i	0.000950468193078001 + 0.00136485102304675i	0.00189548239203812 + 0.000750175385122296i	-0.00211097466365969 + 0.000342423162285092i	-0.00215743541545923 - 0.000343453558243313i	0.00112321903861583 - 0.000943137748285646i	0.000248365081065598 - 0.000275101695559541i	0.00108982344472133 - 0.000427594367501574i	0.00159343303503367 + 0.000169438056031957i	-0.00211698113982942 + 0.00207778575315561i	-0.00126964457549987 + 0.000643804975896368i	0.000986910192786721 - 0.00184750279623480i	0.000510450983894246 - 0.000308738504692928i	0.000495539746398475 + 0.00224306602264149i	0.00125749800142521 + 0.000582638250295629i	-0.00150159397930557 + 9.02415516389947e-05i	-0.00191465138370942 - 0.000441426732815688i	0.000654663066438400 - 0.00148912042713852i	0.000499614354575028 + 0.000205341586821367i	0.00131462863586381 + 0.000288759697082034i	0.00143502187862969 - 0.000243226901826473i	-0.00224213527970443 + 0.00185073114526006i	-0.00170995581037324 + 0.000505367884642549i	0.00116143586450276 - 0.00202106316968314i	0.000177954865390798 - 0.000585318028637613i	0.000530197264555474 - 0.000302943826859978i	0.00112362861037184 + 0.000234316769205129i	-0.000806509098760456 + 0.00256701841180917i	-0.00131931777650438 - 0.000358906041574660i	0.000104620855284225 - 0.00204457756872469i
0.000358931268388024 + 0.000882951522802250i	-0.000823867252386085 - 0.00113126809495420i	-0.00152483308831015 - 0.00211584788019094i	0.00180963045952107 + 0.000680326140540254i	0.00172630457515307 + 0.000772313872178583i	-0.000391831502427804 + 0.000307183093811432i	-0.000630984984651226 + 0.00114023705949058i	-0.00178227914675458 - 0.000699942581675818i	-0.000619479655377361 - 0.000970402086683788i	0.00209019125753724 + 0.000133739640912292i	0.000786877682997735 - 0.00125953550294025i	-0.000162576738861830 + 0.000557240683575701i	-1.86359864578619e-05 + 0.00285258794908983i	-0.00166237449267302 - 0.000390900759490753i	-0.000388106942707919 - 0.00175830254472883i	0.00121941177205339 - 0.000530601730612824i	0.00144144936082571 + 0.00151171888818462i	-0.000938340194082886 + 0.000730381281255957i	-8.57497579592904e-05 + 0.000260108339482516i	-0.00156291949944369 - 0.000854291822950440i	-0.00123186786699483 - 0.000803263604259117i	0.00246513855138390 + 3.03564778274258e-05i	0.00124288485639866 - 0.000538856543146587i	-0.000588337185885646 + 0.000605791563623288i	-0.000259329112239256 + 0.00195919876250414i	-0.00185666465519272 - 0.000184662308362168i	-0.000261039082419571 - 0.00144094115682087i	0.00198160938302805 - 0.000810789382661027i	-0.000448413811882639 - 0.000712398676617261i	0.000233115389597470 + 0.00113580519631209i	0.00149777970572963 + 0.00220049174969704i	-0.00193476176081648 - 0.000323039600515745i	-0.00166022478818852 - 0.000664888109572337i	0.00247388038681823 - 0.000175684610228911i	0.00164514689359419 + 0.000264482677412034i	-0.000908233284754248 + 0.000914846920517587i	-0.000460928177844728 + 0.000780698335239837i	-0.00181909073366721 - 0.000179416152886991i	-0.000374188615747062 - 0.000826137777881521i	0.00246983749255083 - 0.00108091365806401i	-8.72420072103252e-05 - 0.000532907228110908i	-0.000343784580148661 + 0.00122220297067648i	0.00106485067765978 + 0.00190861876101908i	-0.00187245381381596 + 5.06898778287984e-05i	-0.00104599592060974 - 0.00178989837503793i	0.00143180592883235 - 0.00130134133198879i	-0.000300145596055245 + 0.000379489269973655i	0.00107998291512694 + 0.00111464609368924i	-0.000589925054701531 - 0.000378295525716297i	-0.00158758336351397 - 0.000437980537289368i
6.25117529690667e-05 + 0.00122241642696219i	-0.00132588262247838 - 0.00155624571462192i	-0.00143643072651286 + 0.000756293327570683i	-0.000110089175156484 - 0.000360849672474658i	0.00135603665133879 - 0.00205387571430476i	0.00149203177717721 + 0.000942104477403424i	7.03477015109640e-06 + 0.000926929012387401i	-0.00144823160799595 + 0.000431007735952634i	-0.000957118841592297 + 0.00139148195016227i	0.000303855938676560 - 0.00184363202415681i	0.000369990046366082 - 0.00219010861223357i	0.000361780415411713 + 0.00124510222370510i	0.000926558154227153 + 0.000603906534556121i	0.000309572938738332 + 0.000972562586799635i	-0.00119040087981229 + 0.00133636812522291i	-0.00138993089853568 - 0.00240583850129432i	0.000987755651212738 - 0.00166111917795403i	0.00217104602364733 + 0.00130118237636277i	-0.000138124266881333 + 0.00101902183149010i	-0.00224585672226117 - 0.000268899572986939i	-0.000572013001508236 + 0.00114492992512031i	0.000437050648833482 - 0.00118875203096663i	0.000390424054576736 - 0.00225761598328996i	0.00105411238981214 + 0.000924720422254035i	0.000305927779092448 + 0.000988686394149797i	-0.000549052259580106 + 0.00104372846356972i	-0.000499552641112528 + 0.00111355314926042i	-0.00106043378208487 - 0.00250932858968606i	-0.000187323031821932 - 0.00153093616409128i	0.00145404961633652 + 0.00176602084602668i	0.00100522620734460 - 0.000127325347101686i	0.000201562951682728 + 0.000300434504091416i	-0.000359286612818766 + 0.000611434075239115i	0.000515373768320805 - 0.000597883407475836i	0.000327577039696849 - 0.00193942737383848i	0.00178508916903147 + 0.000555886354750690i	-8.96154213334465e-05 + 0.00122846160369403i	-0.00161656677127354 + 0.00102631633646372i	6.01635571152202e-05 + 0.000746586133374337i	-0.000465931979806279 - 0.00223171849109063i	-0.000347962207814227 - 0.00168861996789058i	0.00155680657005888 + 0.00147298066161918i	0.000610457176645274 + 0.000592874625066747i	-3.81369530722671e-05 + 0.000532699393086108i	-0.000474783717973307 + 0.00103666795260332i	-0.00238150773532531 - 0.00161563602833648i	5.54398340832613e-06 - 0.00106715400296239i	0.00275118768146820 + 0.000785745436335478i	-0.000225489179539385 + 0.00123879481235044i	-0.00259922500269846 + 0.000926175023207101i
0.00262655653327099 - 0.000770752954172054i	-0.00120921835467153 + 0.00173006063559338i	-0.00185156281522055 + 0.00120390570617456i	0.000251327512164873 - 0.000968789028043622i	-0.000484597596775873 - 0.000359079351411755i	0.000504768843586247 - 0.00135464384245133i	0.00147304607278009 - 0.00101392122025928i	-0.000304635712372966 + 0.00253975497130613i	1.70750684513326e-05 + 0.00150027315933422i	-0.000374869236731798 - 0.00121014909760858i	-0.00195603582295723 - 0.000724245255142944i	0.000449319837666043 - 0.00100034990397688i	0.00168841270648356 - 0.000221125729350986i	0.000397036949152956 + 0.00146369200616929i	0.000748623634889380 + 0.000144075875586886i	-0.00128736519536076 + 0.000213113689305452i	1.77258351677997e-05 + 7.27233837153544e-05i	0.000909773780493239 - 0.00102250433022738i	0.00138217415451626 - 0.00143009356280927i	-0.000416299871007465 + 0.00275056052428313i	-0.000729789645406916 + 0.00169207210483548i	-0.000332027355229582 - 0.00165635081388266i	-0.000886607590850467 - 0.000616526348024535i	0.000211490015539589 - 0.00105200763139282i	0.00117895403242640 - 0.000501743355209777i	0.000759032462802493 + 0.00223910713556505i	0.000471170400226223 + 0.000424567261217879i	-0.00142159032708993 - 0.000681597456377366i	-0.00220982150651391 + 0.000522600130538446i	0.000902672928161949 - 0.00145831072916635i	0.00197171774688612 - 0.000887538333787523i	0.000299877514610154 + 0.00133880757561720i	-0.00127898650698705 + 0.00168879772802058i	-0.000571216820203729 - 0.00180749635699964i	0.000153457854154811 - 0.000489243344574671i	0.000296328498508461 - 0.00101229677220659i	0.000571627839080616 - 0.000844426024721875i	0.000957613853006613 + 0.00272450313082800i	0.000133871248614345 + 0.000927136273794409i	-0.00154134617188554 - 0.00143900987481949i	-0.00142350014265069 + 4.99836902061495e-05i	0.000555106581054275 - 0.00108896622188215i	0.00161552671851143 - 0.000600220031565907i	0.00101322751514365 + 0.00165151989737005i	-0.000282891535355733 - 0.000180502277702048i	-0.00147282571468625 + 0.000438144662629043i	-0.00119060814121930 + 0.00146320460368616i	0.000480086712236448 - 0.00249895306518391i	3.00107785310494e-05 - 0.00104382989585255i	0.000900543991639110 + 0.00281730660761537i
9.29946665052409e-05 - 0.00156935996163800i	0.000242438075014577 + 6.61174894289504e-05i	0.00156239954104175 + 0.00197978982044220i	-0.00158752090611354 + 0.00132224475561532i	-0.00112915615647048 - 0.000753287010497570i	0.000774316471844219 - 0.00157650536648815i	-0.00115464725359706 - 0.000718420106713078i	0.000987348923842608 + 0.000420687414908758i	0.00269667752171561 + 0.000845124783287906i	-0.00131779490557071 + 0.000761907265392150i	-0.00171631795301731 + 0.000233066185969944i	-0.000363321593032274 - 0.000629914012815165i	-0.000575683186695633 - 0.000863858571100579i	0.00209425476816658 - 0.000478073304101142i	0.00147209799243380 - 2.83638796602996e-05i	-0.00177587881377034 + 0.000988279666779662i	-0.00100015957402603 - 0.000439176219546015i	0.00125510897797580 - 0.00209685142374737i	-0.000857449858886750 - 0.000629535779177317i	0.000526465919910270 + 0.000587825988947181i	0.00247943677313481 + 0.000920069508292370i	-0.00120792210587105 + 0.00135524726018069i	-0.00180095107426780 - 0.000388747010891096i	-0.000129454353039442 - 0.00152784610246139i	-0.000518430673752362 - 4.12364114429904e-05i	0.00183155383837748 - 7.38612192173991e-05i	0.00188192555512268 - 0.000339700457208326i	-0.00171410936288394 + 0.00128014380563099i	-0.000921000251229424 + 0.00112424537427323i	-0.000227929700103084 - 0.000455791989088385i	-0.000862930405250659 - 0.00128148188389022i	0.00179131796988628 - 0.00145878770811125i	0.00175467857240310 + 0.000873137643999681i	-0.00108485943827123 + 0.00175500848395736i	-0.00157806587101326 - 0.000648345790819174i	5.56209245504112e-05 - 0.00237549725330092i	-0.000385402659420273 + 0.000430102327811147i	0.00141620100265662 + 0.000447687625400434i	0.00203268764433020 - 0.000488221723769794i	-0.00133781559752838 + 0.00153446642502171i	-0.00162681552972040 + 0.000628395198466335i	-0.000399817085095777 - 0.00108579018120829i	-0.000103784325963491 - 0.000450748310935654i	0.00185602806292334 - 0.00119605649159134i	0.000899231027260663 - 0.000121930791995383i	-0.00140529451869881 + 0.00237512416523966i	0.000222924138399896 + 0.000703717447136997i	-0.000282076649076340 - 0.000820066195849961i	-0.000154176754835234 + 0.000463666138405308i	0.00103490090742628 + 0.000957513533685486i
-0.000939136349150763 - 0.00208676663250994i	0.000932915416104045 + 0.000229462302214991i	0.000654987743637762 - 0.000105821827478528i	0.000943238201090516 + 0.000911674767193483i	0.000544721538353210 + 0.00183716759264107i	-0.00254837823077416 - 0.00114153221175116i	-0.00129716597666628 - 0.00103576405175391i	0.00175071827082132 + 0.000501950256174642i	0.000757433277438132 - 0.00120260821657565i	0.000728144591083384 - 2.60077464789992e-05i	0.000371119412848427 + 0.00198395794083096i	-0.00216406454313884 + 0.000425488799412097i	-0.000710884218704309 - 0.000208956347367509i	0.00114246295468822 - 0.00119318683191258i	-9.15535083236969e-05 - 0.00204929609344895i	0.000749727159967109 + 0.00123124908044374i	0.000773222874548213 + 0.00142789226373621i	-0.00217632134896612 - 0.00130102685418832i	-0.00141831492385277 - 0.00134521849551817i	0.00184971944366807 + 0.000342924292800696i	0.000657401128069707 - 0.000357964592999483i	0.000796472914408538 + 0.000120384839863326i	0.000611775967628488 + 0.00144986029743662i	-0.00284382079477485 + 0.000399498892459175i	-0.000910142862057790 - 0.000479166901397149i	0.00205470473990904 - 0.00105003797502936i	-9.97290334341196e-06 - 0.00141738418091571i	0.000409205823981963 + 0.000722401883590460i	0.000877433783377061 + 0.00190907854421146i	-0.00144971819493514 + 0.000533001046983647i	-0.000492253404138244 - 0.000347147194954556i	-0.000134201307089270 - 0.00151485059758165i	0.000635296485764595 + 0.000376151805847454i	0.000688767406638805 + 0.000690896471908549i	0.000745193983886376 + 0.000792254215192922i	-0.00302972965524916 + 0.000146412539131499i	-0.00117788585996971 - 0.000636184699576203i	0.00253762086878470 - 0.000946907248371014i	0.000263211928755827 - 0.000635931086475103i	0.000193979177025808 + 0.000364014641428825i	0.000751165754230156 + 0.00138742660254726i	-0.00194257388805030 + 0.00120823659701638i	-0.000528782347768033 - 0.000584139371185435i	0.000812510623451549 - 0.00207212276195078i	-0.000692785497616999 - 0.000912588274599811i	0.00146465665004944 + 0.00128523109283934i	0.00138960897219582 + 0.00138949530269259i	-0.00171920604029041 + 0.000194909919962867i	-0.00133125908912716 - 0.000661528209898764i	0.00248948922745749 - 0.000943821914925507i
0.000647728101229597 - 0.000587635829824540i	0.00119950832701055 + 0.000269874594484314i	-0.000534540928673236 + 0.00257402809511553i	-0.000220683930968765 + 0.000255354966296219i	-0.000923436982843633 - 0.00183890640288532i	-0.00156693135961340 - 0.000472850636338322i	0.00169932616885194 - 0.000482797450116698i	0.00191257916623931 + 0.000318754959233359i	-0.000538647544112224 + 0.00140140598695032i	-0.000270805337421370 - 0.000155683071851031i	-0.00144671053503792 + 0.000217589188109428i	-0.00150703238243798 + 0.000298785259408812i	0.00210237827031021 - 0.00225277033791544i	0.00143177379892136 - 0.000609324466315016i	-0.000846172747076504 + 0.00196462375422183i	0.000198994442445061 + 0.000660189390293948i	-0.000538302699400710 - 0.00252455728164647i	-0.000687991143327102 - 0.000402003859727294i	0.00106546047794385 - 0.000274987330641832i	0.00146532996222237 + 0.000338813782939786i	3.69266290757506e-05 + 0.00197430128893669i	-0.000530765088598668 - 0.000384804971186675i	-0.00167502191221505 - 0.000653459634766737i	-0.00117112321018556 + 0.000480254851584900i	0.00200508809126890 - 0.00178998011554246i	0.00173133721479910 - 0.000424519275902211i	-0.000682619562656543 + 0.00202438364052690i	-0.000604111368309685 + 0.000136359765029166i	-0.000721911512991330 + 0.000554676030754175i	-0.000741478402750089 + 0.000222912797122047i	0.000652528891829682 - 0.00303021331107663i	0.000647062708492710 - 0.000418993093402899i	0.000528009792758870 + 0.00244506777895936i	-0.000688699065863873 - 0.000286243799381041i	-0.00183162858590293 - 0.00158639060755461i	-0.000593965860474728 + 0.000353062939224842i	0.00168123947982283 - 0.00107124962520011i	0.00164168640830016 - 0.000182260227212837i	-0.000139965199892294 + 0.00194982315471350i	-0.00119885371966085 - 0.000221102812464532i	-0.00111609758176616 + 0.000262712207388969i	-0.000231505602297381 + 0.000563690710081488i	0.000832712721833889 - 0.00295791195983969i	0.00100212845963674 - 0.000594896603411792i	0.000319119508417454 + 0.00280855703990043i	-0.000337208963164736 + 0.000390008992158401i	-0.000620489799641693 + 0.000123506667532597i	-0.000736504080833843 - 0.000239930557077803i	0.00127216411285780 - 0.000324985603531907i	0.00115407912232763 + 0.000142488743187139i
0.00104940718238516 - 0.00131133877823655i	-0.000367378960129700 + 0.000211026004944535i	0.00154107273799273 + 0.000882352687926032i	0.00161130396313587 + 0.000548147428246799i	-0.00249341451331495 + 0.000410748850824237i	-0.00140579379573454 + 0.000112952331765877i	0.000525484219361560 - 0.000887379288877295i	0.000248007891173881 - 0.00111488928600083i	0.00206346889501922 - 7.79103776924531e-05i	0.000308443185433039 + 0.000884298456012056i	-0.00221168604299784 + 0.00127760087056784i	0.000409459465051573 + 0.000652380800552829i	-0.000145451265454340 - 0.00116444431612175i	-0.00136534210771124 - 0.00192354319741296i	0.00201366266281406 - 0.000228193666359160i	0.00111582002893790 + 0.00160319929003547i	-0.00227663758955808 + 0.000659636986603947i	-0.00169194137086196 - 0.000681744058071784i	0.000711001049066212 - 0.00134720834306323i	0.000465314977544537 + 6.91181771993977e-05i	0.00190179338212439 + 6.80857231012086e-05i	0.000501242952679597 + 0.000244335921729407i	-0.00243911422305656 + 0.00151058910691338i	-0.000225059804323641 + 0.000418486653211869i	0.000299286175979100 - 0.00131903069625971i	-0.000647226139121418 - 0.00142664378549207i	0.00186495774474165 - 0.000541388726879150i	0.000684559708521326 + 0.00159159835148130i	-0.00142327712196279 + 0.00190272412506145i	0.000507794195053258 - 0.000626074607398013i	-0.000991119916535799 - 0.00118743680691480i	-0.00174782000828368 - 0.000488531671748530i	0.00159197739825523 + 0.000473270558368507i	0.000678584901484449 - 0.000331196235914409i	-0.00229369078618852 + 0.00158180882529642i	-0.000978071883256870 + 0.000129172008076016i	0.000494129087616503 - 0.00157704351460099i	0.000284303160600283 - 0.000661207288925366i	0.00165097943449634 - 0.000600058392051329i	0.000220541571123723 + 0.00112040635686311i	-0.00159955393230527 + 0.00234565528397595i	0.000330265492977353 - 0.000676606497377137i	-0.000454491265218816 - 0.00154156066940585i	-0.00138084942421777 - 0.000458602692879295i	0.00184051538202587 - 0.000835204267455309i	0.00162013045150841 + 0.00124191005389866i	-0.000728911805141872 + 0.00191627701986624i	-0.000602656955184686 - 0.00103184820482164i	0.000398511329179329 - 0.00187594277764501i	0.00119892508110731 + 0.000191591338951474i
-0.00265112426394182 - 0.00138436765051043i	1.71747850529293e-05 - 0.000900997208856120i	0.00260742556163269 + 0.000335260879025629i	0.000284498962126661 - 0.000929118954230124i	-0.000201753110805377 + 0.000873759517048441i	-0.000202188451563951 + 0.00201782592219133i	-0.00175822933164888 - 0.000441280658181516i	-4.73222228645006e-06 - 0.00100261317374646i	0.00112089578308555 - 0.00132179090887001i	-5.79259537269246e-05 - 0.000940432108245446i	0.000993709318167572 + 0.00234212797626279i	0.000411369552551705 + 0.00153688873807203i	-0.00162743740276916 - 0.00132803648474214i	-0.000662634523329748 - 0.000203119194501004i	-0.000310849458601148 - 0.000630911771571277i	0.000483143983368886 - 0.00125640963842821i	-0.000227253212023527 + 0.000471288768981561i	-0.000175441128904326 + 0.00145948902254987i	-0.00240371405970868 - 0.000121752301764436i	0.000223808714007960 - 0.00115797457654358i	0.00214886685347919 - 0.00126842721118577i	-0.000387385080902621 - 0.000461959727508257i	0.000342673473562196 + 0.00188377807312463i	0.000476984980526857 + 0.00155859023271408i	-0.00172367854492692 - 0.000745002613701949i	-0.000333205648613104 - 0.000929119014625045i	0.000122683044701492 - 0.00104852266084710i	3.06570164659741e-05 - 0.000528321402774707i	0.00252010462732753 + 0.00162939766310161i	0.000198487860083361 + 0.000941948274169187i	-0.00284270123570768 - 0.000614933419736180i	-0.000229620035520888 + 0.000211687395156955i	0.00290181731039215 - 0.00113491827188409i	-0.000391920250619294 + 8.65862191549688e-05i	-0.000274847258493783 + 0.00133850041944147i	0.000386568694290142 + 0.00126728067089909i	-0.00180226597154851 + 1.70979247079923e-05i	-8.94466287862428e-05 - 0.00141882357764893i	0.000797001666924692 - 0.00160559717008409i	-0.000285376796304478 + 0.000224351734706052i	0.00188704838866675 + 0.00177449975031455i	0.000432882971222605 + 0.000859757165522461i	-0.00266783377451328 - 0.000538319125918672i	-0.000309673777600718 - 0.000572354468292903i	0.000248199660661905 - 0.000473295774355305i	0.000166433801703575 - 0.000607196030464667i	0.00273188054402085 + 4.33237812039736e-05i	-0.000223420991768987 + 0.00106981460255711i	-0.00184966930694164 + 0.000668846955870412i	8.94725291971336e-05 - 0.00155506648191353i
-0.00125770458661347 + 0.000961250028920983i	-0.00114161395463527 + 0.00161596485172101i	0.000170160259667216 - 0.00273167328261384i	0.000976700038667517 - 0.00164659661900314i	0.000668536970825706 + 0.00156031905043603i	0.000164664423222751 + 0.000362745551655359i	-9.29637472961150e-05 + 0.00131504132217389i	-0.000615833571167162 + 0.000792986367955094i	-0.00122654761429088 - 0.00258667478380667i	-0.000363575075775648 - 0.000623864552956843i	0.00160538990867707 + 0.000923838145387934i	0.00164566587606608 - 0.000378491360194068i	-0.000433001490358420 + 0.00142066708760837i	-0.00161442296779712 + 0.000684133613600322i	-0.00105156945474900 - 0.00142229710236793i	0.000165936794627950 + 0.000341773322131211i	0.00108440652988067 + 0.00149096326488315i	-0.000719334877889729 + 0.000308004568413385i	-0.000405507564137103 + 0.00124174266054557i	-9.01777457221530e-05 + 0.00102980938848390i	-0.00128613623797190 - 0.00280741417962333i	3.89422506609332e-05 - 0.00118102950281109i	0.00172289877123051 + 0.00144112556085127i	0.000720270763430517 + 0.000239283561725692i	-0.000135771866021571 + 0.00108347578694361i	-0.00106013468519605 + 0.000407982682187877i	-0.00176121185092315 - 0.00165718498027886i	0.000299523966587905 + 0.000173294121702734i	0.00184980728632495 - 0.000327213075388855i	0.000915731917441188 - 0.00129002794653227i	-0.000188735784905908 + 0.00224064817290893i	-0.00136556693566246 + 0.00147394864915124i	-0.00106123568327415 - 0.00262990432265579i	0.000423592458717878 - 0.00155244430858805i	0.00182301674937452 + 0.00154471056860851i	-0.000249918962043938 + 0.000853279699194454i	-7.49166323421298e-05 + 0.000873966778455453i	-0.000295303015453539 + 0.000147808311419203i	-0.00222461063270728 - 0.00178277891813764i	0.000246518420091266 - 0.000247947371471811i	0.00236643245523090 + 0.000268097671797657i	0.000593521146005003 - 0.000534014434580498i	-0.000215740371415310 + 0.00155771916400462i	-0.00137102910087287 + 0.00100247081390143i	-0.00162764466417617 - 0.00120120000627889i	0.00120738308744238 - 0.000296233758390595i	0.00103064880135498 - 0.00109729307262967i	-0.000271521818905766 - 0.00100515899605049i	-0.000305973366030259 + 0.000862275257069306i	0.000417442363962410 - 0.000122174915336621i
-0.00110200506892330 + 0.00241682634339908i	0.000615198400679772 + 0.000594948380409385i	-0.000537651501079557 - 0.000504949304865497i	-0.00203833888120590 - 0.000733766727378658i	0.000986013724484058 - 0.00193311364414204i	0.00152749646022407 + 0.000547951375118176i	0.000307540928385220 + 0.00209651369358181i	0.000553428526062838 - 0.000445625549658398i	-0.00166314845767835 + 2.42783050134667e-05i	-0.00195013977927097 + 0.000616129143616829i	0.00125707942164816 - 0.00166496906115717i	0.00125323591775624 - 0.000786661465064152i	0.000603780289070230 + 0.000722541857059168i	0.000409655518180200 + 0.000568573297641027i	-0.00183121610821191 + 0.00163651112557842i	-0.000806764226286967 + 3.56791243844207e-05i	0.000899273151316554 - 0.00214441419916024i	0.00116797968998804 + 0.000590901080546548i	0.000203384175444599 + 0.00277501509278731i	0.000304947665648676 - 0.000586178727945760i	-0.00125321801175926 - 0.000477875956033297i	-0.00185784294857624 + 0.000542569490895453i	0.000748251553132386 - 0.00187293746964344i	0.00180077638395443 - 0.000287103154042918i	0.000892736783018483 + 0.00141874234169413i	-0.000327429213121659 - 0.000161353665083775i	-0.00181609193020427 + 0.00116099106874298i	-0.000742791469247445 + 0.000570245251018579i	0.000995625357711717 - 0.00250560778770462i	0.000211108394825263 - 0.000731559574639476i	0.000517746070781851 + 0.000749182296069442i	0.00103923327082558 + 0.000673458823876824i	-0.000984207642406183 - 0.000891001468072756i	-0.00133732054224973 + 0.000209256626463714i	0.000269355197022820 - 0.00194249160339093i	0.00188813219773789 + 0.000155734848848630i	0.00122817854237581 + 0.00208601854692551i	-0.000868515461932668 - 0.000642542994629063i	-0.00173685434546785 + 0.000443163361305998i	-0.000640781419531141 + 0.000917345284355388i	0.000625703882702857 - 0.00231317783959938i	0.00104313314948165 - 0.000819571140571303i	0.000816208229454170 + 0.00102303308274354i	-0.000156665591785686 + 0.000532940798876302i	-0.000958700986847903 + 0.00198030865915848i	-0.000609134421512694 - 0.000349046271555100i	-0.000179691493881108 - 0.00306618770053966i	4.15778782276572e-05 + 0.000316825473767229i	0.00148319218790216 + 0.00253163285041669i	-0.00113791636390478 - 0.000751764669916761i
0.00193157895565925 + 0.00107580329776927i	0.00141425812538539 + 0.00123873253962983i	-0.00164832851818677 + 0.000262180514119086i	-0.000476544273049566 - 9.82506517075863e-05i	-0.00105451029941270 - 0.000441905823146829i	-0.000834035608943310 - 0.000890991210625497i	0.00313002720864021 - 0.000547850360132567i	0.00102009736763519 + 0.000445923448602269i	-0.00220312085784688 + 0.00117944883887658i	1.29448765119277e-05 + 0.000894788935007812i	-0.000525652381543976 - 0.000318995163114958i	-0.000860672510875461 - 0.00143415116634794i	0.00177087602034003 - 0.00131980788478260i	0.000373241808947072 + 0.000418354167002053i	-0.000205827525588155 + 0.00200374383470345i	0.000909267950259316 + 0.00101916662469813i	-0.000857989665454102 - 0.00122330803495700i	-0.000779116078481392 - 0.000272930110030339i	0.00297077268469399 - 0.000186954643261379i	0.00124791723333239 + 0.000576177995032539i	-0.00230928086006393 + 0.00115209267280103i	-0.000401264838905104 + 9.64638855769134e-05i	-0.000459813417767874 - 0.000154884820127333i	-0.000631455462457526 - 0.000808188365521931i	0.00218091492825538 - 0.00181691282803715i	0.000538227695400237 + 0.000549854118711809i	-0.00106543513268398 + 0.00245302328301557i	0.000550105378904224 + 0.000494239347611675i	-0.00115116192986398 - 0.000954089461202347i	-0.00122378144565452 - 0.00115339495568777i	0.00140656223626909 - 0.000979282608145451i	0.000544716498097046 + 0.000697877892614283i	-0.00191921062607867 + 0.00122929073814980i	-0.000827010348455842 - 0.000580883836074431i	-0.000586381204578792 - 0.000387846993944124i	-0.000275034484265428 - 0.000104168609261521i	0.00240387290683694 - 0.00185062462390407i	0.000734126713407266 + 0.000491278601638242i	-0.00163797083910023 + 0.00263881551284116i	-7.13504564167559e-05 + 7.03781965830959e-07i	-0.000475612852429076 - 0.000792927252141908i	-0.000774307562787153 - 0.000826079605518785i	0.00113997711072679 - 0.00171369876465640i	0.000623637799639098 + 0.000976642931876322i	0.000521291268832264 + 0.00214040103941205i	0.000466328291660132 - 0.000224796449175780i	-0.00237351792747126 - 0.000309000641907028i	-0.00125309355791120 - 0.000589099858095175i	0.00238902557405490 - 0.00138447258573036i	0.000818085322346935 + 0.000346032402706043i
0.00144055247685894 - 0.000205426363043858i	0.00109934988770627 - 0.00103615476954815i	0.00112559925752755 + 0.00118841430080106i	-0.000694445387400642 + 0.00118245465445425i	-0.00219079492758023 - 0.000312616128293377i	0.000223369214771395 + 0.000547512257759412i	0.000598209575357209 - 0.00135345026454620i	-4.81625153990419e-05 - 0.00228896162521567i	0.00153475971811567 + 0.00170402434428383i	7.85478762497753e-05 + 0.00205827305028931i	-0.00145371188617096 - 0.000203370939665651i	6.99351214911126e-05 - 0.000176695985722219i	-0.000813667245643389 - 0.00143711704185951i	-0.000548443000696463 - 0.00113182218409019i	0.00248076782462381 + 0.00135033969213987i	0.00103728420907392 + 0.000471306674978537i	-0.00275623053171439 - 0.000213696114934015i	-1.35489548397026e-05 + 0.000187245531201112i	0.00127995888613468 - 0.00114424532214980i	0.000162546955825948 - 0.00168203507823643i	0.00141428968737518 + 0.00127496357948383i	-0.000364869664727702 + 0.00195736863061795i	-0.00195669749760653 + 0.000135698032524241i	0.000679438998437478 - 0.000510851097817962i	-0.000304053286744405 - 0.00150384075576903i	-0.000940923416921830 - 0.00113983232877647i	0.00249943672101139 + 0.00127902814319763i	0.000929904961453773 + 0.00128986451590356i	-0.00179443276986141 + 0.000162612271233430i	-0.000628035275546138 - 0.000101397797302810i	-0.00109330492582262 - 0.000997774335023488i	0.000245553512448059 - 0.000649531198755724i	0.00116450989569184 + 0.000865440716356182i	-0.000599669015564859 + 0.00139106366429039i	-0.00234817708073988 + 0.000578045419907488i	0.000847602063832480 - 0.000668077129595605i	0.000380089600021875 - 0.00162700944981703i	-0.000939381138248773 - 0.000961630114082443i	0.00216852301920978 + 0.00105874413765273i	0.000662582746332150 + 0.00182044605481752i	-0.00199275827643379 + 0.000412379778909176i	-0.000139386248148636 - 0.00111913820594243i	-0.000841517287332379 - 0.00101884372566807i	-0.000290846032987444 - 0.000110004829465897i	0.00295597964701023 + 0.000114792014651974i	0.000443880712404012 + 0.000313008637696586i	-0.00181242202337345 + 0.00104223964527302i	-0.000465254655955939 + 0.000661652003395094i	0.00104070765897304 - 0.00177806615174441i	-0.000496442208254591 - 0.000554288919391330i
-0.000504009121315962 - 0.00167761574984831i	0.000668976911011820 - 0.00115517105172477i	0.00128573321490367 - 0.000192526400438220i	0.000488390034632884 - 0.000282768698891368i	-0.000564891429718393 + 0.00257438076307009i	-0.000508608027844769 + 0.00103856769721810i	-0.000488211929937931 - 0.00243771745881668i	-0.000720066943473192 - 0.000408858130129204i	0.000348645552655110 - 0.000238711535946059i	0.00167292045340319 - 0.000583412864933541i	0.000946204286158942 + 0.00241201658884044i	-0.00107242269997022 + 0.000489320777569949i	-0.00182225064628743 - 0.00169220898979600i	-0.000519098506840524 + 0.000743069388296988i	0.00110838410374487 - 0.000751683797362816i	0.00136646502342758 - 0.00167899010605624i	-0.000886403318281985 + 0.00196947952504475i	-0.000337596192221125 + 0.00131704171614624i	-0.000728659864135681 - 0.00218849147904679i	-2.01327271854931e-05 - 0.000943070424123420i	0.000692531444891757 - 0.000231490414086151i	0.000783841978081214 - 0.000136314271070542i	0.000917079155046439 + 0.00259508225652671i	-0.000802209410851382 + 0.000458528292702479i	-0.00197041026798181 - 0.00224159471714357i	-0.000189724156068632 + 0.000414533924561537i	0.000936814062905030 - 0.000209190673758104i	0.00120654229154831 - 0.00134946608225731i	0.00119041357666920 + 0.00165013833819013i	-0.00119265592612266 + 0.00104913956345111i	-0.00207733285484829 - 0.000335310620898923i	0.000295149593018240 + 0.000324073963085380i	0.00135101209878214 - 0.000295259853013417i	-0.000157110306255415 + 0.000351989303520647i	0.000506798121559611 + 0.00246677819796298i	-0.000338477114085409 + 0.000471164315133493i	-0.00194730135794958 - 0.00231756455210505i	5.01072460091864e-05 - 0.000200511097087895i	0.000898758861994999 + 5.64206028320565e-05i	0.000834293121046579 - 0.000650724912432711i	0.00162459320808523 + 0.00161448396620703i	-0.00130959619681902 + 0.000801812856327631i	-0.00273207578333288 - 0.000822172075633589i	0.000781225460811864 + 0.000179272287593012i	0.00119128117816828 - 0.00119362347222886i	0.000199580354150836 - 0.00130508415285240i	0.00107089695724555 + 0.00165088897877766i	-0.000600952503709040 + 0.00135376231142416i	-0.00176023094939689 - 0.00192953770766102i	0.000233037932824625 - 0.000899593046569382i
0.000145785651259248 - 0.000872327677646623i	0.00283487553724335 - 0.000270745142043623i	-0.000274802271147091 + 0.00109302726711712i	-0.00247791482664690 + 0.00145929886323100i	0.000468840891150465 + 8.28078130444916e-05i	-0.000250902404665418 - 0.00141780236082466i	-0.000439555242216543 - 0.00135459104568399i	0.00181605728798923 - 0.000109104817906896i	0.000120197560863962 + 0.00127310321133686i	-0.000248724048333951 + 0.00158319812110159i	0.000236306087954688 - 1.13304037222028e-05i	-0.00241690575652937 - 0.00151899166406386i	-0.000348105398414392 - 0.000860129306042737i	0.00267019213677002 + 0.000266846997013004i	0.000228307671747229 + 0.000314122643504177i	0.000108174074969833 + 0.000460865889127642i	0.000204475408464678 - 0.000489481073533071i	0.000240230225104364 - 0.000927442886704372i	-0.000167369218047778 - 0.000913556148972445i	0.00187071949043879 - 0.000830027992696362i	-4.36441426442559e-05 + 0.00159439853140181i	-0.000977235852174011 + 0.00212544561204831i	0.000325791397249311 - 0.000694098684474683i	-0.00154932334891902 - 0.00158249063719159i	-0.000469442089049977 - 0.000753131484833697i	0.00225641308389757 - 2.50673602655347e-05i	0.000395806747294022 + 0.00108502055789758i	7.63501069756400e-05 + 0.000744436116502029i	-0.000239207132540224 - 4.45748855813131e-05i	-0.00287757572883097 + 0.000150081707903599i	0.000174629494097106 - 0.000925886018892443i	0.00291182399226341 - 0.00128585148149413i	-0.000171455102162311 + 0.00154519968904817i	-0.00161755112852313 + 0.00248152395197829i	0.000143096997117148 - 0.00118709202006646i	-0.000557098323730664 - 0.00153833806202116i	-0.000329597033940927 - 0.000525384867548491i	0.00162756662612679 - 0.000512917358957561i	0.000513467641095716 + 0.00163625117681463i	-1.12801140870928e-06 + 0.00135925950569933i	-0.000418916315111402 - 0.000925132987883031i	-0.00248059320904124 - 0.000262359729661543i	5.97744599888536e-05 - 0.000609033119665516i	0.00279001547816291 - 0.00107656751410824i	0.000261913000123603 + 0.000999736321130884i	-0.000446005803625483 + 0.000669959732828414i	-0.000307280979621427 + 0.000248170055725816i	-0.00187700890737775 + 0.00125126176453665i	0.000132951216390315 - 0.000225127291774733i	0.000982857557628734 - 0.000995591446821957i
0.00112657279959413 - 0.000261705738716590i	0.000576845168938827 - 0.00142401180714665i	-0.000218211245332574 - 0.00103421728033470i	0.00150251240691437 + 0.00263167470965240i	-0.000299663016902808 + 0.00141843347850536i	-0.00183007685224636 - 0.00121113345485818i	-2.23576695164250e-05 - 0.000641311815141018i	-0.000244060591403422 - 0.00109151624790126i	0.000525177606141477 - 0.000202760555477684i	0.00238293496972969 + 0.00153445206223720i	-0.000294752916858505 + 4.70863400373252e-05i	-0.00211392530797398 + 0.000250122630969005i	-0.000664755592784638 + 0.000826620357033956i	-0.000144057944003407 - 0.00182914610930931i	0.00139344193192368 - 0.00114967522959403i	0.00161098543827884 + 0.00100761682473833i	-0.000689745774460828 + 0.00160040204646333i	-0.00190231234157695 - 0.00102788577286904i	0.000818155729747825 - 0.00122316922821361i	-0.000112456508649169 - 0.00100640721979379i	-0.000165859196313012 + 5.42310623835800e-05i	0.00257725538470845 + 0.00157574105049547i	-0.000204317435844114 + 0.000605685744543342i	-0.00248925138002088 - 0.000219479447278353i	-0.000348012270517967 - 0.000171996372782405i	-9.83976010677284e-05 - 0.00114863445585623i	0.00122223848527656 - 0.000537035669113759i	0.00213372477987140 + 0.000639673608133494i	-0.00130590847852533 + 0.000353609994064564i	-0.00131226918307058 + 0.00124792202963664i	0.000353237418039702 + 0.000753289457454263i	-0.00110949074991484 - 0.00222395379465098i	-0.000638623160998919 + 0.000337122011936264i	0.00230045761307275 + 0.00151165351138096i	-0.000147965792683847 + 0.00109323452852413i	-0.00257102939053649 - 0.000410718747541135i	2.45959009207528e-06 - 0.00125869044691163i	3.48237712299741e-07 - 0.000663136558550006i	0.000805981429928814 + 0.000235297534983677i	0.00246750438772116 + 0.000297312855758056i	-0.00108925212871892 + 0.000488694399078689i	-0.00203112270175853 + 0.00104878019693099i	0.000236098826547675 + 0.000115506074741041i	-0.000546888145757239 - 0.00161210622795345i	0.000993392861541732 - 0.00132651060710113i	0.00191552633449536 + 0.000518097639390724i	-0.00136158090892044 + 0.00155965931564953i	-0.000298243598695121 + 0.00111231298885957i	0.000336466340508431 - 0.00215664991043455i	0.000147899843068534 - 0.000510475455785076i
-0.000766869035551017 - 0.000467693365052253i	-0.000515082245764694 - 0.00292081488077979i	-8.42312825221990e-05 + 0.000489702948052552i	0.00108736514049559 + 0.000422602515095410i	0.00151512948505747 - 0.000365126216791630i	-0.000104945286123663 + 0.00210475102545829i	-0.00188241620774704 - 4.87708553282460e-05i	-0.00139161272031063 - 0.00165959723146612i	0.000732990950422151 + 0.000562101161642183i	0.00166842510483443 - 0.00103283164744312i	0.000636580425884212 - 0.000837909168242918i	-0.000421671772158352 + 0.00244255653935718i	-0.000762191343285978 + 0.000762999368274810i	-0.000853073609316532 - 0.000624414476501237i	-0.000214701012096642 - 0.000553082852675227i	0.000700674068883078 - 0.00234921961360900i	0.000773742709599466 + 0.000171520989619861i	0.000243341978395316 + 0.00206177696536433i	-0.00170781526167014 - 0.000425252238106877i	-0.00168420540752051 - 0.00219381337246362i	0.00111598032490102 + 0.000735251998529923i	0.00157024469411522 - 0.000270681642946512i	0.000537865720805159 - 0.000897493729832838i	4.06390520664461e-05 + 0.00209675090625764i	-0.00152671238848144 + 0.000774673452536526i	-0.00130964684858166 - 0.000883975581682291i	0.000944721428484453 - 0.000456137845528387i	0.000864480017391816 - 0.00194767727494539i	0.000222354894768452 + 0.000157057162317975i	0.000535979228316412 + 0.00289921489130842i	-0.000354896046112522 + 2.01163191267397e-05i	-0.000970467532320872 - 0.000713038833654279i	0.00122576773694973 + 0.000527475940506313i	0.00148827732800920 + 0.000378319660705121i	0.000341430326217535 - 0.000508517783845215i	0.000469332521758951 + 0.00162638616336798i	-0.00194355361507454 + 0.000546555517637470i	-0.00185502470061034 - 0.00108677453845788i	0.00182989382747731 - 0.000367814870933729i	0.00116264763385387 - 0.00128722283551572i	-0.000264004073081425 - 0.000103565618122083i	0.000580603501877924 + 0.00244588422130757i	-0.000820452413347987 + 0.000606727911587434i	-0.00110863676168956 - 0.000783057254186410i	0.000207122368083249 - 0.000817270241137778i	-0.000268416860403704 - 0.00185409395767329i	0.00111994498771639 + 0.000702576267399701i	0.00180669202589330 + 0.00241432504999563i	-0.00192887545318941 + 5.85311902557460e-05i	-0.00227042859373563 - 0.00118137102105491i
0.000600588941215111 - 0.000124633347845277i	-0.00264746370449009 + 0.000211744086923773i	-0.00124293550008575 - 0.000577643168457039i	0.00178954606751603 - 0.00136036269426907i	0.000660059664742968 + 0.000408562179794349i	0.000797512555778700 + 4.60685788735788e-05i	0.000391415472923848 + 0.000292700622718303i	-0.00225598428148512 + 0.00223263691869943i	-0.000629044537875446 - 0.000525694432721651i	0.00114344731193781 - 0.00264839444742714i	-0.000174486948325624 - 0.000115617940008145i	0.000840893503891494 + 0.000537868651374276i	0.000920771175277462 + 0.000923531532167856i	-0.00100367547217196 + 0.00175643571836174i	-0.000557998208088201 - 0.000937554724269352i	-0.000980247142754066 - 0.00173823487980670i	0.00108373450584963 + 0.000930218050358051i	0.00102189061381779 + 0.000522880242440665i	-6.50281377265180e-05 - 0.000285551275119338i	-0.00231721406514270 + 0.00192528951338149i	-0.000818472803685631 - 0.000439123030451057i	0.00142623969889541 - 0.00262032296137673i	0.000596669976845663 + 0.000287379139682578i	0.000363605412382941 + 0.000398455359401705i	0.000321459365783706 + 0.000564265315472047i	-0.000786352109865553 + 0.00235122396888961i	-0.000673371887463705 - 0.00102263503102489i	-0.000596319316188290 - 0.00258251165051260i	-7.86263712273645e-05 + 0.000433916972259729i	0.00186664507565601 + 0.000299956324958643i	0.00106781225917901 + 0.000595739233908606i	-0.00115058547618437 + 0.00149092297246055i	-0.000815598739050250 - 0.000350591054130884i	0.00124822215117578 - 0.00229121676266265i	0.00133362789983069 + 0.000572191968290525i	0.000293995393678792 + 0.000365929741615476i	-0.000430382282427982 + 0.000177175602467723i	-0.000729724268603257 + 0.00255108035708252i	-0.000694880602497759 - 0.000865976412483626i	-0.000215780503826816 - 0.00310180598060174i	0.000615888639500783 + 0.000513371458142950i	0.00103882698671729 + 0.000730472749497357i	0.000554091405646238 + 0.000579950014109971i	-0.000364998998678417 + 0.00164918679254038i	-0.00130449316254533 - 0.00118251239921064i	-0.00129940294094076 - 0.00124919345898083i	0.000602504545058735 + 0.000634452752574051i	0.00214288281801869 - 0.00117338739712519i	-0.00119264075774804 - 9.20384887735109e-05i	-0.000855130655298125 + 0.00224987550423360i
0.000252087500223931 + 0.000119389535875130i	-0.00135453898828630 + 0.00122876403748382i	-0.000327051436856382 + 0.00100408995272656i	-0.00153090201842823 - 0.000768360211803443i	0.000560953635543969 - 0.00158266779901766i	0.00213888563800209 - 0.000765704989774461i	-0.000888056874078927 + 0.000633779337277581i	0.000203896736272538 + 0.00161814173056084i	0.00100792802420248 + 0.00100421761700659i	-0.00248044145362557 - 0.000835069797908724i	-0.000740618085301667 - 0.00165638479192819i	0.00172728337438649 - 0.000573295125129853i	0.000253697601824459 + 0.000826251220913868i	0.00128345439145289 + 0.000886495862056729i	0.000119898548443142 + 0.000238226499857836i	-0.00297333312942242 + 0.000204827479209595i	0.000687833752383221 - 0.000848854146136401i	0.00238830302325755 - 0.00117878103572726i	-0.000710008192658322 + 0.000730586474279809i	-0.000487007417835429 + 0.00175985647295079i	0.000646796605560920 + 0.000706056566679100i	-0.00196851669487261 - 0.000572456785071327i	-0.000356677004670823 - 0.00195843800567991i	0.00179545944643725 - 0.000966194787720727i	-0.000108752747161973 + 0.00164675691496627i	0.000913483450357360 + 0.00105933282606434i	0.000521803301665551 - 0.000192258790979901i	-0.00288613984688755 + 0.000266670467885290i	-0.000706987309616158 - 0.000708394793300664i	0.00169977434514893 - 0.00121638657808994i	0.000706760589538156 + 0.000162792185706754i	0.00122966665514561 + 0.000466126091365440i	-9.92596213379989e-05 + 0.000191231557943124i	-0.00132331736760804 - 0.000358082390964249i	0.000191664399348825 - 0.00176274679512724i	0.00168420053821057 - 0.00143100159772601i	-0.000301444524687466 + 0.00201515667757964i	0.000439997934475659 + 0.00142059118508883i	0.000601778054336933 - 0.000474368437249108i	-0.00240831540614568 + 0.000218709777749183i	-0.000944909443663847 - 0.00122554299527476i	0.00171327378982583 - 0.00132424811054510i	0.00101061667834458 + 0.00131898195942644i	0.000911532407348437 + 0.000432523122068816i	-0.000685823322507834 - 3.79726572625774e-05i	-0.00237819807838721 + 0.00139892109705870i	0.000209070851879206 - 0.000727192142856266i	0.00103367999819618 - 0.00189056600446726i	-0.000287955504635158 + 0.00191593513130000i	-1.40852144764526e-05 + 0.00183575023603000i
0.000205520912368075 - 0.00131912510130384i	0.00122565912829650 + 0.00163017472353990i	-0.000426642856218476 + 0.00120080001549905i	-0.00100811036802164 + 0.000604556714586787i	-0.000101398067973568 - 0.000188799999414804i	-0.00103006168210456 - 0.00257977756156972i	0.000484382897965319 - 0.000427136736619111i	0.00214229193704677 + 0.00204016881152580i	-1.02082537679706e-05 - 5.79509550568108e-05i	-0.000672567830241526 + 0.000266735965713456i	-0.000935502430129152 + 0.000902327340974724i	-0.00185694649053215 - 0.00152585976970005i	0.00131508337335157 - 0.000855075953694289i	0.00258070830450678 + 0.000325129716757027i	-0.000700180823458496 - 0.000267747218817345i	-0.000788491395384046 + 0.00162282274666919i	0.000684539716269499 - 0.000703302871550336i	-0.000418054294841135 - 0.00226499900168238i	6.49626438433584e-05 - 0.000441313007811058i	0.00200183484051143 + 0.00179338728359521i	-0.000200093538572988 + 0.000708044077682341i	-0.000748911658259507 + 0.000232501673187881i	-0.000532766320061442 + 2.65800519384743e-06i	-0.00201854978387321 - 0.00150141530167606i	0.00122105227322875 - 0.000567850059675864i	0.00301867688740310 + 0.000708229079095627i	-0.000913878391050527 + 6.58933867804174e-05i	-0.00104125716681256 + 0.000874517280433816i	-0.000188574887304764 + 0.00105158387756877i	-0.00156183502825969 - 0.00101238352568440i	0.000954948888104527 - 0.00149168948264449i	0.00176671288704596 - 0.000689579586680013i	-0.000366713635744002 + 0.00139775343303705i	-0.000998570714971063 + 0.000517473698163067i	-8.35578672257286e-05 - 0.00100085847108511i	-0.00170416398719044 - 0.00151638356665074i	0.000861502922181759 - 0.000172796931639402i	0.00302134127444771 + 0.000872531723008492i	-0.000798223384109369 + 0.000544238959200775i	-0.00118424733679625 + 0.000361681536599157i	-0.000270435872959441 + 0.000385416481038661i	-0.00176915111430482 - 0.000479101524593486i	0.00126433033851000 - 0.00141289122229754i	0.00247530672923379 - 0.000746557093892067i	-0.00115617326555380 + 0.00112680050755166i	-0.000354782321330066 + 0.00176895149850235i	0.000209438926519946 + 0.000328059989827396i	-0.00171687293546074 - 0.00118331659385919i	0.000447095295591088 + 0.000264863185311198i	0.00256198414595320 + 0.000791661291656991i
1.04524574472271e-05 - 0.000346957872316177i	0.000635873118046960 - 0.000501525148675191i	0.000956237119657615 + 0.000278455377583235i	0.000735604069274847 + 0.00234683387805447i	-0.000630301403926005 - 0.000390714307186915i	-0.00195888854926888 - 0.000978848560119008i	-0.000778058536907714 + 0.000462337503773533i	0.00158667780698422 - 0.00159858816134860i	0.00167592806950938 - 0.000254845127922675i	-1.62242530032318e-05 + 0.00188826289399232i	-0.00103213326330396 - 0.000170046254279150i	-0.000991642479192889 + 0.000734673326337787i	-0.000361415809595748 + 0.000497016156151604i	0.000459379369741432 - 0.00321056596541064i	0.000866995851298278 - 0.000514586669482827i	0.000640981268050219 + 0.00254560096956726i	-0.000776080936221030 - 0.000111330285564621i	-0.00203218534155659 - 0.00179303461564065i	-8.78305583030158e-05 + 7.51686532395421e-05i	0.00118413671116521 - 0.000831312729119245i	0.00137963073620165 + 6.13345010152705e-05i	0.000667869167676388 + 0.00174550121584670i	-0.00146071098606487 - 0.000334317764491036i	-0.00153382505713194 + 0.000302381522794490i	0.000112261028501677 + 0.000579110462640557i	0.000665717055563039 - 0.00278431545833925i	0.00117650876290221 - 0.000607299748680590i	0.000567840861694357 + 0.00251347006623702i	-0.00102025766359831 + 0.000422023842903272i	-0.000416531018653494 + 0.000402571582306491i	-0.000183431637187385 - 0.000208321210119505i	-0.00105605940851521 - 0.00266010843106871i	0.000751416283367338 + 0.000459791906688988i	0.00133123495413834 + 0.00155988048320643i	-0.00154299090632291 - 0.000302331122370925i	-0.00214118874847703 - 0.000251750755418474i	0.000526779061856652 + 0.000299094304688376i	0.000888858981029488 - 0.00194981661897599i	0.00125183492707637 - 0.000451137408062025i	0.000700877085940959 + 0.00205989096637785i	-0.00178912526176080 + 0.000487944415942450i	-0.000602273589908050 + 0.000372311791555299i	0.000567628707740824 - 0.000214020709129708i	-0.00100063902052689 - 0.00265893815015545i	0.000827189069248387 - 0.000226898823864069i	0.00195074736191305 + 0.00224405037989107i	-0.000676180152015583 + 0.000499704810293704i	-0.000808213550236097 + 0.000181407895563380i	0.000839424502071838 - 0.000305311111558645i	0.00107050800356690 - 0.000953393183203840i
-0.00164446489432420 - 0.00108905195753272i	0.000392815859677395 - 0.00176239070932600i	0.000548051544649299 + 0.000793441093950218i	0.00187344549067896 + 6.56215260634457e-06i	0.000601114481504062 - 0.000192833013658302i	-0.00216095131360515 + 0.00185215837966445i	-0.000689888147448177 + 0.000216158951192373i	0.000125567797198273 - 0.00138380079618892i	-3.72314164040395e-05 - 0.000890787008603481i	0.00176145996638894 - 0.000962375539184191i	0.000333876466127391 + 0.00130018166143196i	-0.00125823956874810 + 0.00239291468105654i	0.000456304881083188 - 0.000728218873567750i	-0.000893235217081406 - 0.00120334442030677i	-0.00154512914838557 - 0.000424590562078277i	0.00190155019786734 - 0.00112682197874709i	0.000675893449401481 - 0.000541549624480296i	-0.00180177246631431 + 0.00178786644407854i	-0.00142400333972412 - 0.000136631292923748i	0.000126219176786629 - 0.00167345261655424i	0.000953925615560105 - 9.73895265081980e-05i	0.00154698838188261 - 0.000816408220867510i	-8.94635822541872e-05 + 0.000691461895211306i	-0.00128247541554434 + 0.00264463664792228i	2.20804341027175e-05 - 0.000575783966740271i	-0.000458533089006725 - 0.00153830059888942i	-0.000820975600374624 - 0.000465080177141078i	0.00140815503118433 - 0.00120275102040657i	0.00134977930245356 + 0.00147167501723852i	-0.000309875153069253 + 0.00230066626760332i	-0.000692392638148365 - 0.00144465498111577i	-0.00151731908784466 - 0.000530345298761686i	0.00176960231496251 + 0.000645261397502924i	0.00139326107033507 - 0.000375342190454986i	-0.000461328950802521 + 1.65924892988970e-05i	-0.00111563045093883 + 0.00253519053064152i	-0.000581954669570412 - 0.000273453365252280i	-0.000266850954153298 - 0.00178049995774876i	0.000282847851285336 - 0.000481911793252105i	0.000985606976585496 - 0.00107766473582249i	0.000683708799690277 + 0.00150430472959260i	-0.000142407211223433 + 0.00264565084628043i	-0.000770270375019620 - 0.00158761232473928i	-0.00117999913177994 - 0.00111656119387590i	-0.000478676751530380 + 0.000545362890507198i	0.00126103076737118 - 0.00151852837029505i	0.00181124514832392 + 0.000546319718710223i	0.000120057842524119 + 0.00194453013916855i	-0.00116743024878537 - 3.44341733777873e-05i	-0.000344031711989211 - 0.00185055827601576i
-0.000625156671885944 - 0.00203048725683721i	0.00145542013487149 + 0.000617319339813492i	0.00199879824649788 + 0.00211680975365723i	-0.00125371959322450 - 0.000537545288004678i	-0.00134641037232421 + 0.000106117985842334i	-0.000494932163756402 + 0.000617113500866422i	-0.000676598731792644 - 0.00174790250115909i	0.00194661634682570 - 0.000695495121139764i	0.00176701538941232 + 0.000704176683185868i	-0.00157624250239654 + 0.000497813241573111i	-0.000787839556464029 + 0.00173350066112798i	1.97958863262559e-05 - 1.32981727913187e-06i	-0.000859795871563055 - 0.00247269374626098i	0.000738077897995165 - 0.000495862906693453i	0.000995772384376429 + 0.000450718828284963i	0.000176025930762188 + 0.000694938930683946i	-0.00129326188270535 - 0.000386205897661137i	-0.000287557962228878 - 8.58955501181768e-05i	-0.000956511767465907 - 0.00126629458945436i	0.00212472290814319 - 0.000332703565641941i	0.00223755001175790 + 0.000862767924100774i	-0.00214565213502762 + 0.000502012419985803i	-0.00114060409413393 + 0.000979872585417516i	0.000324869583683506 + 0.000108127241919563i	-0.000866183878284223 - 0.00181101128438377i	0.00121217892405494 - 0.00104123584794960i	0.00126722533239142 + 0.000398679631395677i	-0.000794613994435667 + 0.00137259279136053i	0.000388909492040984 + 0.00171808082138033i	-0.000765484287410699 - 0.000816318779955808i	-0.00193879574800056 - 0.00209821098743231i	0.00122084295527363 + 5.95719983136057e-05i	0.00243842954245535 + 0.000904470510267376i	-0.00221135922199881 + 0.000570306624817982i	-0.00145501730416966 + 0.000277065106576272i	0.000388901799119814 - 0.000110945842922973i	-0.000800255850039907 - 0.00100450370248160i	0.00159789149282363 - 0.00124540080390345i	0.00162575351803679 + 0.000187515516193952i	-0.00161094246436320 + 0.00188714784048829i	-0.000152340393484714 + 0.00131111198237774i	-5.08374344404093e-05 - 0.000959681805857050i	-0.00160639846164808 - 0.00171848917159455i	0.00106855273622135 - 0.000570021363463232i	0.00126980128785150 + 0.000528714347153294i	-6.98897204191156e-06 + 0.00108014209114520i	0.000938767857742814 + 0.000872075632316075i	-0.00188621709755123 - 0.000255751065501616i	-0.000627017770662549 - 0.000282944451208625i	0.00184514717613437 - 0.000987635378531758i
-0.00141679742033216 - 0.000727499468592150i	0.000455363108665606 + 0.000453318303666141i	0.00205961123756535 - 0.00175597341489819i	0.000920081150982202 + 0.000444008348415623i	-0.00102157282118874 + 0.00238969983895612i	-0.00119990474293512 - 0.000448054825058330i	-0.000359554126814248 - 3.71581218167695e-05i	0.000167618616402906 - 0.000404467947696986i	0.000462201883222253 - 0.00274576761752536i	0.000799071472279219 + 0.000973112510344031i	0.000629690040961425 + 0.00281328912328607i	-0.000444939091352677 - 0.000435110247879380i	-0.00126238227887851 - 0.000269442704406078i	-0.000803622591083426 - 0.000680435552557549i	0.000300629989241658 - 0.00168888748188606i	0.00136339111028003 + 0.00112522550970128i	-0.000603586796528591 + 0.00190064119147354i	-0.00185252892317147 - 0.000610065819606728i	-0.000552949230365528 - 0.000118379592911556i	0.000923295592023544 - 0.000142221095519702i	0.000546503929601999 - 0.00259340123801006i	0.000799536839662489 + 0.000746674542440927i	0.000278624701633531 + 0.00301081655564008i	-0.00120464303604617 - 0.000322367753014976i	-0.000545449792611957 - 0.000604517539465649i	-0.000142064297175936 - 0.000725211363093865i	-0.000401089597466019 - 0.00180462664650728i	0.00147155445059151 + 0.00118676745944843i	0.00163579434471168 + 0.00150542709218504i	-0.00101197212781083 - 0.000529433357530712i	-0.00175842677969472 + 0.000796374103311952i	-0.000803915620921788 - 0.000450965150325447i	0.000792702510466944 - 0.00194799823659923i	0.000662050388054686 + 0.000560646566333560i	5.32864790124256e-05 + 0.00265911157291658i	-0.00187849857570409 - 9.12159563804503e-05i	-0.000158874767074934 - 0.000711087571313045i	0.000680900052727419 - 0.000825095248269192i	-0.000793701042714011 - 0.00179663220465833i	0.00131701822870856 + 0.00106780927580071i	0.00168452636917434 + 0.00212203586553876i	-0.00151956972891660 - 0.000295556505243690i	-0.00133014137572338 - 0.000212011106357472i	-0.000426533445297973 - 0.000626108799758731i	-4.25903144076753e-05 - 0.00128515814101170i	0.00218028664713078 + 0.000679969309790365i	0.00104450208787566 + 0.000333616517363597i	-0.00158727846617829 + 6.53408125668052e-05i	-0.000172194616230333 - 0.000589993735825389i	0.00146642848586515 - 0.00100041161768113i
-0.00224666233044213 + 0.00164918481219297i	0.000322454688487323 - 0.000805764040915527i	0.000543979098776686 - 0.00181157114784307i	-8.69903120937512e-05 - 0.000426648674771959i	0.00163213333081083 + 9.28539479138369e-05i	9.17991155445575e-06 + 0.00198619672493673i	-0.00147400794624638 + 0.00148788637844700i	0.000161854859837393 - 0.00198384410500956i	-0.000895506926472247 - 0.00112037895650537i	-0.000549427357946058 + 0.000323385431424379i	0.00256370126462574 - 0.000583338461300922i	0.000946117865149538 + 0.00116468710404800i	-0.00142218730298565 + 0.00136866146338594i	-0.00102858983163836 - 0.000949743251028587i	-0.00122258879307711 - 0.000145037749053179i	0.000731454329064193 - 0.000355894541841026i	0.000987956309595263 - 1.32190638736964e-05i	-0.000590287364136961 + 0.00155487322804061i	-0.00127989339225153 + 0.00187110960508019i	0.000152832268805329 - 0.00203664171874028i	-0.000395723345116559 - 0.00154388462671512i	-0.000312458375908200 + 0.000430452657570901i	0.00189279384082231 - 0.000425735177400660i	0.000975505373052790 + 0.00161381104009232i	-0.00123845835226806 + 0.00150742549997284i	-0.00129140136061572 - 0.00191962071920877i	-0.000912186442497151 - 0.000322286498953152i	0.000707671521547077 + 0.000418129854175230i	0.00206163402839354 - 0.00164811312106192i	0.000323225228149813 + 0.000813824998028569i	-0.000929456221460925 + 0.00189372458375937i	-0.000861680923309653 - 0.000151812187024818i	1.78024791024195e-05 - 0.00191260309526235i	0.000350017579360141 + 0.000382679400209199i	0.00109810704813492 - 0.000149378917112896i	0.000562566529679164 + 0.00181853095463087i	-0.000811210239775657 + 0.00162263077898871i	-0.00135223586759568 - 0.00246198196600858i	-0.000675419032602650 - 0.000737006684369879i	0.000737445094290922 + 0.000919678389185061i	0.00164730550989245 - 0.00131116771809078i	0.000869710375736161 + 0.000867766981038566i	-0.000976904456823869 + 0.00185178493385564i	-0.00181946169756793 - 0.000792624869182420i	-0.000495313218911100 - 5.90801229929915e-05i	0.00121030454986682 - 0.000832766677218111i	0.00100047855179477 - 0.00200475238767446i	3.92447733979829e-05 + 0.00169505198758929i	-0.000295162196816094 + 0.00160524145520672i	-0.00121041128240048 - 0.00248724787649926i
0.000241469163644798 + 0.00190518408628936i	4.96889592275141e-05 + 0.000427932162916143i	-0.00191491889770490 - 0.00109001892987157i	0.000306907914520502 - 0.00129570496735967i	0.000634239198100430 - 0.000600998656865520i	0.000328610939111557 + 0.000705985852675374i	0.00215432734092457 + 0.00134160061776557i	-0.00107050759978357 + 0.000389304560916958i	-0.00303250164636697 - 0.000510660953137866i	0.000823745253225613 - 0.000469780231150060i	0.000826547062446682 - 0.000585585542633092i	0.000336781804776621 - 0.000650698978777875i	0.00192996885405872 + 0.000368941612730530i	-0.00122373525435380 + 0.00158100071505692i	-0.00209527850348629 + 0.00102804396698781i	0.000965886837944627 - 0.00107143834272062i	0.000974650502119794 - 0.00100929509334373i	-1.85214894798351e-05 + 0.00165477393522167i	0.00152649861509702 + 0.00138273635152744i	-0.000676996566144296 + 1.45266802918748e-05i	-0.00271895878665432 - 0.000535900653608225i	0.000516805549115008 - 0.00103673015970483i	0.000900308835689251 - 0.000302326486355760i	0.000540575021546080 + 0.000205284972223765i	0.00196690198664211 + 1.57273395367508e-05i	-0.00138947634985178 + 0.00131044870771337i	-0.00263512612747280 + 0.00100874921341859i	0.00111175669364489 - 0.00143067445186501i	0.000536831396545279 - 0.00136376738779274i	-9.05874003727743e-05 - 0.000235324567667657i	0.00155400390249752 + 0.000380839645311675i	-0.000468756839648651 + 0.00186990837661789i	-0.00200316876081148 - 0.000355763611618701i	0.000149192719725115 - 0.00155378739576283i	0.000844528385414471 - 0.000401700280464813i	0.000795465324351870 + 0.00121158803801100i	0.00172196682078039 + 3.31356983702869e-06i	-0.00137896416151434 + 0.000729736530975052i	-0.00275237184340830 + 0.000869085242479070i	0.000873145199158146 - 0.00162787583169432i	0.00110944149733942 - 0.000876885386874714i	0.000198595996901245 + 0.000150123462662171i	0.00115383039724748 - 0.000282789174663137i	-0.000692118847633424 + 0.00204714274049362i	-0.00133264692490884 + 0.00145849495335550i	0.000227870362323324 - 0.00233788732409739i	-0.000603787657109171 - 0.00142340164621510i	0.000375486055748960 + 0.000355395797479724i	0.00120876195196021 + 0.000318913687919670i	-0.00128946072191508 + 1.72359937432175e-05i
0.00208667208318572 + 0.00182054122901202i	-0.000418966660963342 + 0.000402090580270408i	-0.000655949617104058 + 0.000579786985666256i	-0.00108601905362609 - 0.000355763900896913i	-0.00142315339637412 - 0.00145727338981222i	0.00162408163609631 + 0.000254768545566959i	0.00190483141833479 - 0.000271819664689957i	-0.000355280568005740 - 0.000337613056103519i	-0.000491207873940214 + 0.00235014395061061i	-0.00135969747356878 + 0.000539956501619702i	-0.000845084571036154 - 0.00198491981429726i	0.00160815367684227 - 0.000568269651947669i	0.000330990015875455 - 0.000669475510653404i	-0.000255699288504012 + 0.000268890237234726i	0.00139913722476756 + 0.00265696153511745i	-0.000914064360038231 + 0.000164188622371840i	-0.00189873586507169 - 0.00127970478561584i	0.00153183561782834 + 7.51286978765594e-05i	0.00242450117382461 + 0.000302956970092976i	-0.000662724055075695 + 0.000218879115898803i	-0.000716905447911365 + 0.00136364673776255i	-0.00132884181222176 + 0.000199101576492954i	-0.00105279200989941 - 0.00134757953517189i	0.00212990198923200 - 0.000662966494661313i	0.000761955383937422 - 0.000646346089126326i	-0.000828806583597278 + 0.000405552243891581i	0.00105223442876861 + 0.00242357043088756i	-0.000971009232681462 + 0.000464593505001917i	-0.00188311592814012 - 0.00196858286405312i	0.00113023177857886 - 0.00106536994479687i	0.000389972641873517 - 9.38688473163705e-05i	0.000397668909291410 + 0.000800931792038798i	-0.000874878886459636 + 0.000402052948419380i	-0.00108338942122787 - 0.000428375307089120i	-0.00128674176787468 - 0.000602124625768394i	0.00222582857765454 - 0.000665744024765932i	0.00140169122721147 - 0.000624999328308429i	-0.00111280391199426 + 0.000725708007527427i	0.000375410332931742 + 0.00188749598876483i	-0.00100021335945009 + 0.000494880386758798i	-0.00152937050849699 - 0.00162700900324230i	0.00168005272323088 - 0.00160285861160545i	0.000338652758343503 + 4.25915871971311e-05i	-0.000293179137817115 + 0.00126822168435617i	0.00195396952550163 + 0.00113639364184157i	-0.00124345740920586 + 0.000139585863951099i	-0.00264117387448555 - 0.000750873041005023i	0.000860311012102784 - 0.00100114410238715i	0.00199249906605208 - 0.000555414615465316i	-0.00106387331163637 + 0.00120138572754591i
0.00118474037619717 - 0.00183670858356700i	0.00183162345906669 + 0.000441806011576098i	0.000310033347188028 + 0.00169692457745992i	-0.00160221493278587 - 0.000339387586576677i	-0.00139427221823848 + 0.000884270971055649i	0.000302192348868917 - 0.000326001468939771i	0.000863987514052725 - 0.00270430783833482i	0.000477387372178888 + 0.000374594057440863i	0.000507738386373802 + 0.00145003796156707i	7.59433901023247e-05 + 0.000579233683121328i	-0.000943246691739196 + 0.00143631672112479i	-0.00101580381228491 - 0.00160128418984881i	-0.000132140854272988 - 0.00252158977831609i	0.000845470659317348 + 0.00155386976501068i	0.00137497448326301 + 0.000600515646627837i	0.000583012835857513 - 0.000481535790404160i	-0.00129608124487237 + 0.000281486198635502i	0.000580474195798985 + 0.000183847670864496i	0.000631462389321443 - 0.00233593314527521i	0.00115189775681811 + 7.04029136222768e-05i	0.000478518503278489 + 0.00160114975348774i	-0.00114386206717080 + 0.000624280317931016i	-0.000652611839742376 + 0.00115080818692973i	-0.000240558096110719 - 0.00146638550677421i	-0.000282416941572559 - 0.00265127264373396i	0.000943469889213112 + 0.00133260431258165i	0.00108425572913346 + 0.00115093157969902i	0.000193068953802613 - 0.000177435598253700i	-0.000642226590904697 + 0.00143612539657687i	-0.00195325051512422 - 0.000878564481800901i	-0.000633058785251311 - 0.00190500161568774i	0.00222006339249493 + 0.000885725277826043i	0.000669106012725586 + 0.00155867834072768i	-0.00227020118117702 + 0.000590447232857458i	-0.000607602882748455 + 0.000697047927600892i	0.000606018541489491 - 0.00115741529852666i	-0.000362247008181082 - 0.00240152268683785i	0.00102301080569758 + 0.000775691971093062i	0.000912612148515691 + 0.00148733019282532i	-0.000481463526225940 + 0.000419774896184588i	-0.000229344985655873 + 0.000932577880150474i	-0.00154805412615583 - 0.00131127801859397i	-0.000962345512970791 - 0.00193657307994166i	0.00240980507447202 + 0.00112376794316791i	0.00127523931290109 + 0.000391430877539637i	-0.000776622714030119 - 0.000332180593163999i	-0.000360012632747710 + 0.00166474226529835i	-0.00167145231232634 + 3.80056641516398e-05i	-0.000307961956502200 - 0.00179575895786110i	0.00111127463516914 + 0.000149393075333353i
0.000119913429976506 - 0.000557021431694297i	0.000201204094314357 - 0.000562618306676766i	0.00184116277165081 - 0.00149239749525929i	-8.64341216379323e-05 + 0.00169599360281593i	-0.00110253060921224 + 0.00248502600921210i	0.000128686009794836 - 0.00104546591233129i	-0.00109069885371714 - 0.00129875142451490i	-0.000374360610888148 - 0.000710328625458808i	0.00168330480563106 - 0.000633764455744213i	0.000563549049613821 + 0.00155639549317594i	0.000365079935181682 + 0.00108903265486815i	-0.000444316186674175 - 0.000605903312015506i	-0.00274849787663699 + 0.000226802745859573i	8.65427497482499e-05 - 0.000828920883503544i	0.00262772162170810 - 0.00135599643908703i	0.000192579223780388 + 0.000878029165057211i	-0.00159289243588583 + 0.00261324043992518i	-0.000275981004166961 - 0.00135626319439770i	-0.000161554990236738 - 0.00120829023705429i	-1.48669714278428e-05 - 0.000490929179783137i	0.00102908204160607 - 0.00111680662229399i	0.000642881921923221 + 0.00193018954385472i	0.000227819619972275 + 0.00179800192245666i	-0.000729790983949679 - 0.00130552586248654i	-0.00209377124954761 - 0.000341215019744076i	2.69298393258892e-05 - 0.000539452871591853i	0.00216589713035267 - 0.00112047815281978i	0.000756226765153037 + 0.00131410322576536i	-0.000135583153651364 + 0.000511332639927648i	-0.000803906169917956 - 0.000110795963797494i	-0.00179707117951961 + 0.00158301101883386i	0.000178208302408929 - 0.00148192110073234i	0.000493591834430725 - 0.00144305765745076i	0.000515276292118390 + 0.00197358192099091i	3.85158996248951e-05 + 0.00241514245866671i	-0.00106883024530752 - 0.00167862860728356i	-0.00121785171188602 - 0.000968139156951351i	0.000177752563079350 - 0.000301460178450180i	0.00132013524556817 - 0.000888387841848308i	0.00119652061483118 + 0.00159932932628660i	0.000114087460257557 + 0.000758889419800626i	-0.00145583251931249 - 0.000737113483826970i	-0.00166146457294599 + 0.00116479927356166i	0.000323437208421974 - 0.00106789950237045i	0.00172026927373401 - 0.00234516927196363i	0.000820929368827752 + 0.00142942997922111i	-0.000440945513223503 + 0.00105666337814328i	-0.000641722432988221 + 0.000237597452248133i	-0.000345772717647839 - 0.00145336878118634i	0.000581404084254872 - 0.000214983661682850i
-0.00187878797090524 - 0.000378771013777889i	0.00117817933684339 - 0.00157559517110241i	-0.000188873294002076 - 0.00114894306744416i	-0.000413849647483793 + 0.000235304759323268i	0.00265250734703364 + 0.00127800064668889i	-0.000191183267566330 + 0.00104969421628899i	-0.00241493519725969 - 8.83205788383482e-05i	-0.000191389003488568 - 0.000975715681417926i	-0.000373359103004771 - 0.000751470410827632i	0.00105612598072483 - 7.34980792983668e-05i	0.00247827642251598 + 7.45985734228116e-05i	-0.00119291165262164 + 0.000545073515099251i	-0.00154329823205879 + 0.00132353714984044i	0.000202695559656371 + 0.000326566134112090i	-0.00103796279509841 - 0.00166125731153897i	0.000974784938480862 - 0.00154658040235015i	0.00206262464794481 + 0.00117300318096994i	-0.000235762674390048 + 0.00144233864707334i	-0.00228069204385502 - 9.70657265337502e-05i	9.63363371961301e-05 - 0.00199403197667609i	-0.000213800055715135 - 0.000477763649691593i	0.000631951092602144 + 0.000673734466290705i	0.00258655588928498 - 0.000150466853456255i	-0.000788413533422053 + 0.000753543830791735i	-0.00213192634355299 + 0.00110501775464644i	-0.000113368449880140 - 0.000501060259759948i	-0.000420683675144671 - 0.00102830226790966i	0.00124035409095536 - 0.00102994703674063i	0.00183295504855318 - 0.000214730798652196i	-0.00142586458307337 + 0.00175926865267976i	-0.000369002336921323 + 0.00133487847314323i	0.000575789524280080 - 0.000524941665997165i	-6.92304848673731e-06 - 0.000557228693101311i	0.000294318658203946 + 0.00130739930409537i	0.00230754407270920 - 0.000150899235303165i	-0.000337684764015649 + 0.000941327800541282i	-0.00234806728135760 + 0.000895137428544431i	-0.000522761089937094 - 0.00145188358599624i	0.000118750835865749 - 0.000514342612256735i	0.00140803804253643 - 0.000175910701288205i	0.00168351206703807 - 0.000760600934207458i	-0.00130646856115831 + 0.00164951005706553i	-0.000976418324774444 + 0.00155541395592654i	0.000310349615600474 - 0.000857153954393224i	-0.00115860929596932 - 0.00101873392628579i	0.000492960423413198 - 0.00148036798323547i	0.00184331280944994 - 0.000146546749504152i	-0.000341838700390215 + 0.00266042781848179i	-0.00210189760282935 + 0.000695679155550318i	-0.000870128672144486 - 0.00229913738321349i
0.000923240756463430 - 0.00129707415357234i	0.000849486920393175 - 0.00211001450406610i	0.000182359096995935 + 0.00184190239204321i	0.000303912952925526 + 0.00162005683074749i	-0.000173620012455659 - 0.000206033383072939i	-0.00126759183417853 + 0.000507773962157417i	-0.000906716340031394 - 0.00193822183322638i	0.000698992247108123 - 0.00160297834378081i	0.00156237173894224 + 0.00225221095365663i	0.000857624728120742 + 0.000331737518714753i	-0.000715619018106443 - 0.000571318788724786i	-0.00161912608781043 + 0.00165910435178711i	-0.000921284177004671 - 0.000925750129238320i	0.000743903453984338 - 0.00178706102455610i	0.00167474996580150 + 0.000422617015040418i	0.000644055181197767 - 0.000258614646190249i	-0.00105889745797443 - 4.24919519934067e-05i	-0.000517252610606240 + 0.000134072920112314i	-0.000263541192073164 - 0.00199494323289569i	0.000240708391956178 - 0.00163216205772296i	0.00152565825149141 + 0.00242324532493918i	0.000652174306095112 + 0.000862512402335231i	-0.000822256532651964 - 0.000750052063604410i	-0.00113139143193716 + 0.00108327756851194i	-0.00131269944686818 - 0.00105796671503737i	0.000618057196670348 - 0.00164457017068385i	0.00251441242327327 + 0.000988136224068591i	0.000302828702651153 - 2.27634754687065e-05i	-0.00146563843164080 + 0.000566735088908362i	-0.000597214816965329 + 0.00198114450328831i	-0.000502337712340951 - 0.00134000593433038i	4.30058054248218e-05 - 0.00188506931765788i	0.00130972587168253 + 0.00211253029027481i	0.000512074259828242 + 0.00135122322039352i	-0.00108947926377573 - 0.000494664497324525i	-0.000601167286858345 + 0.000310629516095463i	-0.00126164752901799 - 0.00130738267610363i	0.000258066174311259 - 0.00132523246779469i	0.00294429483178538 + 0.00140191539942836i	0.000218151978278973 + 0.000341356778144430i	-0.00184905842284992 - 1.96074833892783e-05i	-0.000392300057810470 + 0.00146968115312662i	-0.000834305699868677 - 0.000824181678405826i	0.000207119885582954 - 0.00185355706280371i	0.00206106056182435 - 0.000135364155081227i	-2.99589310668960e-05 + 0.000258996917248318i	-0.000649785282645699 + 0.00181697727170777i	0.000178112412233148 + 0.00146982939442073i	-0.000748611831094717 - 0.00164485508339428i	-0.000162882549473615 - 0.000852574612092084i
-4.55306651116664e-05 - 0.00215060093990115i	-0.00112914715582048 - 0.00122650126289479i	0.000538613374545847 + 3.09841466777628e-05i	0.00218111973374148 + 0.000177855861082085i	-0.000107581866463135 + 0.00155321944131319i	-0.000603199865546212 + 0.000338812291066034i	-0.000915206370053733 - 0.000788929977137937i	-0.00194886622887842 + 0.000281288349587277i	0.00139692305418043 - 0.00117181403904843i	0.00258169266175637 - 0.00113007789875754i	-0.000783114263460424 + 0.00166593093462346i	-0.000697325051459665 + 0.000929442317599729i	-0.000223886086241378 + 0.000155890000961752i	-0.00129641918436441 + 0.000355723297036831i	0.000523632391768036 - 0.00224417656724693i	0.000971101426358087 - 0.00143111682720001i	0.000226239839206930 + 0.00199622672103987i	-0.000523493958850252 + 0.000634997075765221i	-0.00120957042541645 - 0.00173275356736211i	-0.00149194305424106 + 2.43753192462573e-05i	0.00131272233160091 - 0.000527806188729770i	0.00239021184638947 - 0.000862055907251736i	-0.000307235510861450 + 0.00177065670737871i	-0.00108685757841158 + 0.000550570756245059i	-0.000744549304898119 - 0.000293229351170649i	-0.000898468943190107 + 0.000805839396221559i	0.000773830404779067 - 0.00216717731871482i	0.00130459487794695 - 0.00175724063961097i	1.00567870513522e-05 + 0.00256511210754627i	0.000108378021531018 + 0.00126392847245271i	-0.000415465308517120 - 0.000308166253798509i	-0.00130270087302772 + 4.04599816660294e-05i	0.00122379004310122 + 0.000112796713805919i	0.00173194255683880 - 0.000471777791283143i	0.000272192586965493 + 0.00175236201396640i	-0.00108423112014327 + 0.000363596636785807i	-0.00145198390961758 - 0.000824834519040876i	-0.000556301494857774 + 0.000863742235472650i	0.00109823208378028 - 0.00169472826359573i	0.00144701560195543 - 0.00177624031254302i	0.000152500871563982 + 0.00255276024029442i	-0.000780611984662218 + 0.00121419315516038i	-0.000626078640029640 - 0.000481485298755227i	-0.000362665893848748 + 0.000270960278718315i	-0.000302483041036736 - 0.00220411402640024i	0.000387935180669106 - 0.00107577068523534i	0.00143125639617084 + 0.00242756543885209i	0.000817317149959973 + 0.000489408708657060i	-0.00214443216482708 - 0.00131469002505260i	-0.000287699551916354 + 0.000494200857296361i
-0.00143666199728920 + 0.000278482369593820i	-0.00251718553634117 - 0.000368213025817053i	0.000648648430859264 - 0.000885361025171580i	0.000559702948990530 - 0.000711741324118129i	0.00139033442406406 + 0.000107441992996788i	0.00132808526128840 + 0.000598864176383407i	-0.00224025631806958 + 0.000900369716795714i	-0.000993557579379541 + 0.000834689542990772i	0.000848835190483791 - 0.000684531880506536i	-0.000883464390324703 - 0.00199771634596359i	0.00114883289259647 - 0.000680684924212548i	0.00167066448670118 + 0.00151730984228890i	-0.00143641219018999 + 0.00165563200943396i	-8.11147747049834e-05 + 7.56954853430412e-05i	-0.000146691831074991 - 0.00111397294413282i	-0.00218988094185236 - 0.000992626836442483i	0.00109751167897361 + 0.000839139180272855i	0.00147023263523744 - 4.55869904455188e-05i	-0.00207013044611545 + 0.000878028140508235i	-0.00165903790183903 + 0.000746383135205092i	0.000860809547174188 - 0.00112658360089479i	-4.08126496205943e-05 - 0.00133305137407288i	0.00121301399011799 - 0.000514163936082933i	0.00123380813169658 + 0.000958719011755957i	-0.00179674607357123 + 0.00205643484155665i	-0.000219710594924381 + 0.000141262438044234i	0.000374361635437126 - 0.00155238104443703i	-0.00187266650914185 - 0.000905360016118312i	0.00112565285795773 - 0.000494381851687398i	0.00246036893415049 + 0.000711317467162068i	-0.000737513480058821 + 0.00173248318049557i	-0.000695247144331074 - 9.55252233752256e-05i	0.000582646464718555 - 0.00166270663579797i	0.000789773507313565 - 0.000596540320301056i	0.00130606540365689 + 6.98347523485031e-06i	0.000739704882635666 + 0.000197578015934139i	-0.00188649887445596 + 0.00209911481231245i	-0.000532905625212736 + 0.000444388116907877i	0.000587924767816244 - 0.00190527802724237i	-0.00109255875887316 - 0.000851790030868114i	0.000909028750077249 - 0.000543636909218206i	0.00195173171916264 + 0.000788842764376506i	-0.000759113592017512 + 0.00243338296373450i	-0.000717047206311718 - 0.000511972533506084i	-0.000769781457240639 - 0.00162302700703107i	-0.00140199501020625 + 0.000426017537370311i	0.00163998044187247 - 0.000741045429376956i	0.00210417980681348 - 0.000574809357194744i	-0.00174022449752985 + 0.00178215638150008i	-0.000892321916820964 + 0.000786764114127268i
-0.000562120618838026 - 0.000174467839784998i	-0.000175053293028411 + 0.00192291843573236i	-0.00173326469919606 + 0.000119169415642814i	-0.000700992315414943 - 0.00134679185452537i	0.00192456952408231 - 0.000834919605741582i	0.000408183667714008 - 0.00106146101290012i	-0.000124244417169479 + 0.00135441213801249i	0.000604073381695615 + 0.00243174247775125i	-0.00115486551528681 - 0.000825592486262912i	-0.000965311542433982 - 0.00113397645561146i	0.000146128169727087 - 0.000404294502002858i	9.44020785800050e-05 - 0.00121874171709336i	0.00196120297967835 + 0.00117089163836159i	0.00106239175583717 + 0.00176337506657559i	-0.00248172969809010 - 0.000876374533952142i	-0.00118006506160950 + 8.46041913180326e-05i	0.00281573485155604 - 0.000791986029829051i	0.000545917852652932 - 0.000506731947557393i	-0.000838942843863754 + 0.00104196455988507i	0.000551371849716906 + 0.00194550268043857i	-0.00126610220925481 - 0.000149450588960353i	-0.000861028491584065 - 0.00131288289948016i	0.000914435972181331 - 0.00114188428249608i	-0.000117635589737978 - 0.000676144290774420i	0.00130973543150747 + 0.00156334507561068i	0.00126040983327811 + 0.00167220122658969i	-0.00239715595874666 - 0.000838012100926695i	-0.00119337256365591 - 0.000575945710360705i	0.000668919779337930 - 1.44247931130606e-05i	-1.64504555916455e-05 - 0.00112450035900895i	0.00209949117579446 - 4.44871904017146e-05i	0.000941441876144327 + 0.00121133460745522i	-0.00138831526293360 + 0.000395743311528455i	-0.000825147941225583 - 0.00116986442344680i	0.00170955481905231 - 0.00182961032219722i	-4.13678814081937e-05 - 0.000190817898592025i	0.000398115154244958 + 0.00186659185051207i	0.00120190230306820 + 0.00135625212867151i	-0.00197839342978525 - 0.000517196353664419i	-0.00118191423196659 - 0.00101654497722291i	0.000731574248549156 - 0.000636185146150940i	-8.18129926949530e-05 - 0.000305678750848006i	0.00209308218962211 + 0.000380221463980498i	0.00114974106117508 + 0.000916239011890180i	-0.00319556204770527 + 0.000663412739614862i	-0.000838502726993085 - 5.04874728771570e-05i	0.00127087423938514 - 0.000852110055848483i	-0.000338646421638677 - 0.00118098348902953i	-0.000479296099618873 + 0.00204321757002945i	0.000826500939370699 + 0.000864156210152704i
0.000839833245967315 + 0.00134315191969827i	-0.000174927258666725 + 0.000863044017482687i	-0.000395962324333041 + 0.000545045757101367i	-0.000461850246377236 + 0.00156338169048441i	-0.000789394237644697 - 0.00207946380470004i	-0.000361911485968007 - 0.00214149510817388i	0.00111139244099043 + 0.00143803737148918i	0.00153005891929891 + 0.000492016806070165i	-1.41817225050698e-05 + 0.000574535660597411i	-0.00138079341916111 + 0.00107746251727864i	-0.00129872364282209 - 0.00152224569826980i	-0.000208190291622823 - 0.000462780989314299i	0.00132733368791738 + 0.000337923322432911i	0.00162202591779630 - 0.00161358890210976i	-0.000108704016417367 + 0.00137486430841531i	-0.00144962369936854 + 0.00248898208188196i	-0.000562067994607762 - 0.00194397045313852i	-0.000104481296304575 - 0.00255362920464221i	0.00148186043648580 + 0.00151944272283652i	0.000622485396424552 + 0.00109360107035745i	-0.000308362590207611 + 0.000471012427605654i	-0.000465324877605359 + 0.000827430827826586i	-0.00160815265229330 - 0.00169444001794816i	-0.000520351719386246 - 0.000869648961209119i	0.00194490119607557 + 0.000793123404253824i	0.00142631164456460 - 0.000856611413087237i	-0.000267765306694767 + 0.000962391246108224i	-0.00135707293778233 + 0.00195181875149637i	-0.00142993559018870 - 0.00126596948350598i	0.000501539369366617 - 0.000730622462975258i	0.00117669061626974 - 0.000355762876347933i	0.000115971075488397 - 0.00164663509332301i	-0.000833638066401161 + 0.000543750041421791i	0.000358331394449944 + 0.000583677415025470i	-0.00155684419284360 - 0.00173324071236419i	-0.000825432101204508 - 0.00132225056403578i	0.00238071725559775 + 0.000981000390744932i	0.00112731691036630 + 0.000163274255945615i	-0.000517895343285727 + 0.000663263596246043i	-0.000927702527719199 + 0.00111539531080295i	-0.00187308339649360 - 0.00109710993382605i	0.000373929478272904 - 0.000600591768133102i	0.00199853829773409 - 0.000227873995650397i	6.98607880904164e-05 - 0.00134318150288293i	0.000145282983191833 + 0.00162703936987703i	-0.000162343513008557 + 0.00248250830922788i	-0.00179058115632365 - 0.00127002546006839i	0.000136282105338799 - 0.00144717171809678i	0.00254281077572187 + 0.000874952510536051i	0.000741711594604082 + 0.00115415286105818i
0.000381502697731671 - 0.00173517156385950i	0.00183106120949596 - 0.000244074160656397i	-6.05757704854971e-05 + 0.00257498996858182i	0.000335226935327808 + 0.000398135818831795i	-0.000543542780014781 - 0.000960474544864402i	-0.00245369502579760 + 0.000451445958339541i	0.000391742452408061 - 0.00109046289178521i	0.00207691636631043 - 0.00107668274358223i	0.000608888189922739 + 0.00113518058345239i	0.000243143417719338 + 0.000475869810634371i	-0.00144767240850421 + 0.000691554346297164i	-0.00164981323497355 + 0.000854696125705389i	0.00122394641228929 - 0.00187287613508659i	0.000507477204243501 - 0.00149608813249923i	-0.000238507305407991 + 0.000657040037777961i	0.00159443214526065 + 0.000824526590365065i	-0.000390115221280347 - 0.00139904429112299i	-0.00191388929963887 + 0.000242481871410492i	2.31989525186482e-05 - 0.00128117358061368i	0.00202713337092186 - 0.000848181605652603i	0.00104260877383882 + 0.00203380560877834i	-0.000211278672242385 + 0.000147563926626554i	-0.00157274114995032 - 0.000212443592495802i	-0.00143459081238769 + 0.00119417365712776i	0.000879575100745411 - 0.00164179263742210i	0.00108685148366132 - 0.00165041743221398i	0.000323566687315307 + 0.000982122115101695i	0.000582884020282701 + 0.000698163173728664i	-0.000781415832832979 + 0.00156035817551724i	-0.00127384730056332 + 0.000542399213478333i	0.000211512849558743 - 0.00292793254881190i	-6.68560970501455e-05 - 0.000682460695605040i	0.00130621454702571 + 0.00268465017965439i	-0.000426177901044442 + 0.000108378215208031i	-0.00164149899647840 - 0.00104484282356629i	-0.00111329734610916 + 0.00115696401681946i	0.000420055451938185 - 0.00129505499244188i	0.00142048716745657 - 0.00160707718400328i	0.00111159970239744 + 0.00131120089302593i	-0.000339958691473221 + 0.000585131369959755i	-0.00135567998246119 + 0.00104091696165581i	-0.000626127616886450 + 0.000826211874900920i	0.000291164937845572 - 0.00276778237041516i	0.000198227382042125 - 0.00111422808904623i	0.000542924875659223 + 0.00154737301201579i	0.00108760799362571 + 0.000168809751314813i	1.81324620458817e-05 + 0.00137507156982233i	-0.00154273826325813 + 0.000618964471109831i	5.52212874937165e-05 - 0.000986225580456831i	0.00141164293494802 - 0.00128312717263399i
-0.000304878484977940 - 0.000816421819866508i	-0.00123789847394248 - 0.000891901406011243i	0.00216425324904523 - 0.000117327399401481i	0.00242129593896159 + 0.000631306104187756i	-0.00215895068316491 + 0.000746572975475600i	-0.00111366676149245 + 0.000607001984110976i	0.000172964862698407 + 2.39160169333669e-06i	-0.00103260510041917 - 0.00108834949774518i	0.00156855193664917 - 0.00143219604505555i	0.00141137059638882 + 1.37789421992734e-05i	-0.00121200595567033 + 0.00190078138162034i	0.000326300789110616 + 0.00146237277637855i	-0.000481275390105700 - 0.000829980485971707i	-0.00185939176005634 - 0.00163141616317087i	0.00112389177224343 - 0.000580713023022316i	0.00108928024068224 + 0.000322586298442420i	-0.00189246873487393 + 0.000899159000123461i	-0.00137342427038611 + 9.37249868426449e-06i	1.99275518193486e-05 - 0.000446566104484678i	-0.000857246152693098 - 0.000342002491307240i	0.00187628431021815 - 0.00138038558978855i	0.00173783044117557 - 0.000197741566796297i	-0.00177006546684628 + 0.00226378967926350i	-0.000375590450557665 + 0.00102083932245093i	5.97641624595879e-05 - 0.000934861841575556i	-0.00133834269587746 - 0.00110812668501620i	0.000964315506163100 - 0.00123246222412601i	0.00109568037702796 + 0.000269037221243662i	2.51941909269621e-05 + 0.00187721505315521i	0.000949871683578960 + 0.000610512881097956i	-0.00174432048888592 - 0.000518388050704530i	-0.00235017267752274 - 0.000639062317982553i	0.00202539329590341 - 0.000863293602991616i	0.00185600905785994 - 0.000368433077056692i	-0.00191282726747923 + 0.00230149302437453i	-0.00107148128992949 + 0.000593842406446258i	0.000245638899208119 - 0.00105966948222000i	-0.000651363557945838 - 0.000459986200730833i	0.000917441948897544 - 0.00165010446333532i	0.00107162782002601 - 4.35028584268138e-05i	-0.000262989770945147 + 0.00277907118162413i	0.000367502334119634 + 0.000500817658998353i	-0.00117417546429692 - 0.00116069715069657i	-0.00184551982258802 - 0.000552012099551911i	0.00132314134964489 - 0.00108369445586369i	0.00141890936331388 + 0.000306243335352539i	0.000321134266142122 + 0.00118273953426745i	0.000561252260105234 - 0.000180761955919353i	8.27533409605456e-07 - 0.00122714170111996i	6.61285642739987e-05 + 0.000117354744477445i
-0.00227123006111297 - 0.000505935792489509i	-0.000869588881131283 + 2.32993858217383e-05i	0.00129984184518881 - 0.000272404562642885i	0.000448836162197781 - 0.00232455665704571i	0.000945782623229586 + 0.000607534113550514i	0.000311760303576761 + 0.00264937880467674i	-0.00175919120511518 + 3.26845000062231e-05i	-0.000147513074822027 - 0.000446702307449890i	0.000242463925064626 - 0.000941896706041156i	-0.000982222548404786 - 0.00182719577442965i	0.00160137475983609 + 0.00103454425981891i	0.00180680725536729 + 0.00170122593814315i	-0.00136121199927124 - 0.000180500750707174i	-0.00129418740581515 + 0.000310829560639703i	-0.000784814616788883 - 0.000631873645037566i	-7.27668829276919e-05 - 0.00139919049096378i	0.000778428932739542 + 0.000530793088823213i	0.000144045287451961 + 0.00199185792036310i	-0.00230143329744395 + 0.000319263740506503i	-3.96588881941843e-05 - 0.000444055771000729i	0.00102335386295571 - 0.00112023973306541i	-0.00103187081204041 - 0.00168785788382002i	0.00134885972353404 + 0.000841516547699427i	0.00166398036911924 + 0.00212039364141358i	-0.00178318286476857 + 0.000260679531061125i	-0.000865574546426333 - 0.000609632598268762i	-0.000318332997569442 - 0.000946241898582370i	-0.000683261789076884 - 0.000791789004976845i	0.00237191714920716 + 0.000503884672578125i	0.00142438601639513 + 0.000297462543031403i	-0.00180043971028247 + 0.000391252830235671i	-0.000791423444220388 + 0.00139868278374934i	0.00164063328250752 - 0.00135872363912586i	-0.000613119491462881 - 0.00133823073763547i	0.000976717643795950 + 0.000699878157753899i	0.00124546372247777 + 0.00207351485332337i	-0.00204184837224354 + 0.000795302678974837i	-0.000484068643375316 - 0.00115630241282950i	0.000255453882936380 - 0.00141546758065956i	-0.00108927787389910 - 0.000294979750928384i	0.00211085375590852 + 0.000513315722429904i	0.00185769992801305 + 0.000638557924678872i	-0.00202921151282571 + 0.000713245776371066i	-0.00111590796002501 + 0.000286540559894727i	-0.000530005093604935 - 0.000712878175050342i	-9.60873631158577e-05 - 0.00100181804505374i	0.00254175095459632 - 0.000498224002784343i	0.000295910493865453 + 0.000265913524962488i	-0.00211482072522668 + 0.00123025851522459i	-0.000220394761564245 - 0.00122500775079742i
-0.00147902079923603 + 0.000504527550674130i	0.00172316710981223 - 0.00109850775310798i	0.00185060094175426 - 0.000729940547986832i	-0.000394108364700449 + 0.00152469989434019i	-0.000393834261245046 + 0.000738973554240610i	-0.00142906543826410 + 0.000467880176267125i	-0.000865380631111579 - 0.000293662496184595i	0.00170007341518855 - 0.00237541777123500i	0.000249150335046592 - 0.000352737425299267i	-0.000256683645753607 + 0.00172409785274929i	0.00148207066476949 + 0.000723283381676654i	-0.00100523070396261 + 0.000857569051441306i	-0.00206830690931242 - 0.000657306128669933i	0.000489726717031252 - 0.00238798860084714i	0.000558960081554492 + 0.000463589566081622i	0.00112302799528964 + 0.00118232401351013i	-0.00114323882569128 + 7.54640944050141e-05i	-0.00155425951163102 - 0.000203393826084385i	-0.000375987904544412 + 0.000387832037384068i	0.00160329525959985 - 0.00218875711558363i	0.000670285325565264 - 0.000686389960072422i	-0.000200341542583648 + 0.00197583723023895i	0.000445591548579537 + 0.000718807110289267i	-0.000925408821082441 + 0.000788540029190675i	-0.00132714151054677 - 0.000623769635313702i	0.000466865693509274 - 0.00288359286670283i	0.000571091125198977 + 0.000581618988753964i	0.000859786918390427 + 0.00186859284496975i	0.00120413936175084 - 0.000582104450380098i	-0.00122215934451823 + 0.000925941831353119i	-0.00207399850915085 + 0.000446522291516594i	-3.64099124080133e-05 - 0.00205272638116005i	0.00103940410629201 - 0.000910592973753751i	0.000176594805614657 + 0.00207001752181907i	-0.000695005638143119 + 0.000679372933999204i	-0.00110022957610308 + 0.000492965286572151i	-0.000347822471838852 - 0.000416758003162760i	0.000467203103783829 - 0.00294570237167159i	0.000504751013073227 + 0.000324428628495318i	0.000735111989461249 + 0.00229790490300712i	0.000645295388383853 - 0.000289566090901186i	-0.000817627745873704 + 0.000694344207293080i	-0.00180565630793597 + 5.86722475775994e-05i	-0.000493896029509211 - 0.00245542097496466i	0.00154407556324037 + 0.000404307644943809i	0.00169402495552983 + 0.000986672294161400i	-6.09567610704274e-05 - 0.000824582341998585i	-0.00133898174042408 + 0.00169271888275962i	0.000631229198393871 - 0.000173112929511530i	0.000525071924182019 - 0.00255974279499497i
-0.000587911624875290 + 0.000215074294274911i	0.000860489335941204 - 0.000936637003241728i	-0.000562719453714247 - 0.00135660930938971i	0.00150436223017258 - 0.000512252779789600i	0.000793332031819121 + 0.00108775084064761i	-0.00126836612418931 + 0.00186863240073024i	0.000264876363026432 + 0.000365900750049928i	-0.00101388871209825 - 0.00170130040650180i	-0.00134239185435252 - 0.00134004174165795i	0.00218831441938348 + 0.000341020145563628i	0.00109313744196482 + 0.000766613901357564i	-0.000446670382793447 + 0.000546755336874203i	0.000241219356545590 + 0.000528034446449222i	-0.00238638180240867 - 1.59763482439529e-05i	-0.00111957863577065 - 0.000861407010910332i	0.00305649180536338 - 0.00101481945503531i	0.000760637560506527 + 0.000823345074230162i	-0.00194622553473185 + 0.00241536852422323i	-4.31923796917997e-05 - 6.15377180695413e-05i	-0.000115345251403628 - 0.00191038711918481i	-0.00103096546024507 - 0.000945578580198610i	0.00164999959439675 - 0.000118659771684718i	0.00104775050191768 + 0.00105779576710136i	-0.000472898316199618 + 0.00137731545622737i	0.000134261819068213 - 0.000198285602076518i	-0.00215007093885333 - 0.000617255337538645i	-0.00119085205787582 - 0.000560941781370221i	0.00303667049312158 - 0.000869023137124349i	0.000946509323135668 + 0.000324225938616518i	-0.00100865778839289 + 0.000897869477614086i	0.000193881649040392 + 0.000528281311540104i	-0.00164078732365225 + 0.000856435038872192i	-0.000418114411042981 - 0.000439721746351504i	0.00112209627941351 - 0.000577584327581871i	0.000858381671935162 + 0.00102920930952845i	-0.000520291322920651 + 0.00228208784662830i	-0.000131971372960710 - 0.000678592516219526i	-0.00161742209085115 - 0.00138335434394655i	-0.000982641573046210 - 0.000245315761828997i	0.00250172481281830 - 0.000683380176119421i	0.00119339963207223 + 0.000708168962893780i	-0.000777607071279714 + 0.00112302702235057i	-0.000277079192745786 - 0.000268935888142448i	-0.00176261865625072 + 0.000731386093221102i	-0.000650740838852285 - 0.000395443240385597i	0.00234096123724493 - 0.00257634525343419i	0.000510613347198897 + 0.000346328624146990i	-0.000569009599825944 + 0.00198397541113988i	-0.000494624321689820 - 0.000861349934175024i	-0.000960664312952253 - 0.00209031005051880i
6.07044911298451e-05 + 0.00246666083533880i	-0.00185721201078190 - 0.00111622596839920i	-4.73223019692542e-05 - 0.00120176188896534i	0.000452199501725068 - 0.000747337567122358i	-0.000278496134855285 - 0.000689631858606113i	0.00191682534828876 + 0.00165548096689187i	0.000823200818478550 + 0.00103480217828762i	-0.00230662913711789 - 0.000644731108710218i	-0.00113732748026699 + 0.000324176358554733i	0.000158619075100825 - 0.000898288848198856i	0.000936464303595445 - 0.00137629249916245i	0.00199972734306772 + 0.000969948903403488i	-0.000436651515330650 + 0.000475181750865435i	-0.00165641170982892 + 0.000561633949427174i	9.25153817899870e-05 + 0.00157533093526121i	-0.000606946307431533 - 0.00178715994674031i	-0.000832727194389866 - 0.000422210118973143i	0.00164395245115289 + 0.00162051327054460i	0.000977298881581840 + 0.00144749925778290i	-0.00256363824921093 - 0.000606391895002839i	-0.000805588606190076 - 0.000767548397523995i	0.000429425241903231 - 0.000764870571001105i	0.000430485557796713 - 0.000443674047464776i	0.00228201738607535 + 0.000787496496133207i	-9.55392827052754e-05 + 0.000419662581555496i	-0.00237419115626532 + 0.000517669077216132i	-9.23078589213166e-05 + 0.000976368138644781i	-0.000145738221779821 - 0.00143632068913331i	0.000248079207146417 - 0.00205726602233183i	0.00209420392607292 + 0.000692897109328122i	-0.000513932845833598 + 0.00138940872037976i	-0.00105279408150311 + 0.000953047188882147i	-0.000411491118522831 - 0.00163733583373209i	0.000736049550151638 - 0.000912095712752133i	-0.000106571722198804 + 0.000459310687096806i	0.00222349547282487 + 0.000712482489056129i	0.000399681105702876 + 0.000396602298881165i	-0.00280014203360413 + 0.000552285233781942i	-0.000453341518180359 + 9.43833024867962e-05i	0.000325352308608631 - 0.00116791571902344i	0.000510018273654478 - 0.00116362123530549i	0.00216377312889389 + 0.000216580359774062i	-0.000722782554521696 + 0.00122276163287301i	-0.00167140565163918 + 0.00126588857952650i	0.000932367898312036 + 0.000134383520332976i	-0.00107003463546037 - 0.00154775225765877i	-0.000848061188207517 - 0.00157962489211712i	0.00252310711788503 + 0.000324421565671571i	0.000769847529772993 + 0.000396376791613721i	-0.00281954795857360 + 0.000633954624164132i
0.00134383320991586 - 0.000147959086053871i	0.000234646395765816 + 0.00160445255963096i	-0.00157941763071011 + 0.000721224709744273i	-0.00154559604510056 - 0.00242999255399543i	0.000295837573775964 + 5.48901825355577e-05i	0.00166676151502679 + 0.000484798907773916i	0.00113057789357086 - 0.00135210839434416i	-0.000306064815391177 + 0.00157204837309294i	-0.00118101111113933 + 0.00160913079528576i	-0.00108670315795254 - 0.00101774338017954i	3.24531759764480e-05 - 0.000453134256773346i	0.00107480115513385 - 0.00154466530216350i	0.000697239934247105 - 0.000831479986301645i	3.46702826036602e-05 + 0.00291843893116855i	2.27750392723527e-05 + 0.000867106026145975i	-0.000614441479794566 - 0.00126498797797423i	0.000391912081536883 - 0.000128191727954887i	0.00171366824108073 + 0.00110191805888461i	0.000778904055549872 - 0.000975810891818090i	0.000138424419072416 + 0.00124243339762588i	-0.00135412166429541 + 0.00138713681187448i	-0.00190445665617235 - 0.00130342372732100i	0.000791662229854599 - 0.000418882807859084i	0.00168435570336597 - 0.000904734192033544i	0.000127260985017830 - 0.000963279317324704i	2.53995011930010e-05 + 0.00246579835786339i	-0.000275866524323666 + 0.00129837324592745i	-0.000978961530200991 - 0.00119090893599939i	-0.000428213649291433 - 0.000396514770997030i	-2.55464698722060e-05 - 0.00163915907080246i	0.000936632209537505 - 0.000460727546090762i	0.00165841207775426 + 0.00281063907730273i	-0.00118483218101551 + 0.000876772254671129i	-0.00250865911051383 - 0.00152264364206415i	0.00116212738761363 - 0.000417353076707177i	0.00223459815514965 - 0.000212919642951762i	-0.000278288873448274 - 0.000816468337069358i	4.68077375166277e-05 + 0.00174859553078146i	-0.000518297441477572 + 0.00150118347934601i	-0.00155196333484324 - 0.000895981751087933i	0.000452561100400680 - 0.000921360313590624i	0.000565036748765772 - 0.00154973594793078i	0.000152055491337278 - 0.000166842809579568i	0.00146530941889712 + 0.00275234755682807i	-0.000309815036867405 + 0.000475389012272447i	-0.00174952627371852 - 0.00130838366134496i	-0.000373865919268403 + 0.000233832675305090i	-0.000355695665053819 - 0.00103249414446566i	-0.000441740706302122 - 0.000343489964966409i	6.22885132664046e-05 + 0.00102762977767787i
0.00126457069149535 + 0.000210620099511805i	0.000493947806506805 + 0.000838094114648146i	0.000759532171794569 - 0.000185775652281706i	-0.00203778269075008 + 0.00138887555020924i	-0.00174865021553902 + 0.000459058417156221i	0.00164700255846445 - 0.00248371126214985i	0.000690850020914466 - 0.000690124109380103i	1.72130553372972e-05 + 0.000827889929892355i	0.000915663274424959 + 0.000510892805774630i	-0.000837163371711088 + 0.00184913920536839i	-0.000941541907795902 + 7.40205501190646e-06i	-0.000137198134067480 - 0.00255725188112766i	-0.000722530284581110 - 0.000419316860467206i	0.00152478809956681 + 0.000689395665166069i	0.00201909430657330 + 0.000425552435544567i	-0.00134563933157077 + 0.00126960283128266i	-0.00168157559416454 + 0.000482045304638641i	0.00148228604995804 - 0.00232023534189176i	0.00132172257745939 - 0.000304384749347182i	0.000137248425415504 + 0.000959533811011389i	0.000171587374963376 - 5.07979516121668e-05i	-0.000902502650744823 + 0.00204230637717927i	-0.000916722667717657 + 0.000350799630213889i	9.54800269519622e-05 - 0.00320644005662178i	3.74238857389355e-05 - 0.000429898178022790i	0.000990901986819952 + 0.00121881418253315i	0.00126199164264556 + 0.000362799414876348i	-0.000694236225641488 + 0.00146621862260870i	-0.00120159182433319 - 0.000346162026715045i	-0.000916023003242506 - 0.00165618053646554i	-0.000349868887276832 + 0.000438468731143928i	0.00207912249654416 - 0.000656650089830695i	-0.000508418287077874 - 0.000421456030261158i	-0.00117206182949148 + 0.00180015914724542i	-0.000790235951487207 + 0.000622029772388670i	0.000256735422751207 - 0.00334142471306581i	0.000821537070265446 - 0.000504751389014551i	0.000661472968742366 + 0.00151797879292934i	0.000258699932702975 + 0.000291782203827571i	-0.000181705898990885 + 0.00159699622145692i	-0.000907514166932043 - 0.000243120701707971i	-0.00128240974556700 - 0.00242445160543684i	0.000131648113332051 + 0.000336047422449557i	0.00198623331420422 + 0.000257666165688269i	0.00125688150579721 - 0.000305780489812164i	-0.000998509602551764 + 0.00191315038488412i	-0.00162111555889938 - 4.77193472191359e-06i	-0.000639389328158546 - 0.00114062906157393i	0.00143258166707041 - 0.000526977385976381i	0.000653899002750581 + 0.00152049954489966i
-0.000188678178890796 - 0.00120815180229798i	0.00254274850300126 - 0.000764794794388723i	7.77170855160590e-05 + 0.000203256376546492i	-0.00119730183505386 + 0.00143275907497535i	0.000963757849520514 + 0.00143709348040758i	-0.00135382981562120 - 0.000547282847011881i	-0.00143923532954405 - 0.00197777155673648i	0.00189921596393019 - 0.000919096793732614i	0.000456021685515320 + 0.000938639381186812i	0.000245325604011147 + 0.00129107108685950i	0.00112607697852532 + 0.000341188952940946i	-0.00239036596827372 - 0.000238378672470810i	-0.00170239106577748 - 0.000365212347672685i	0.00179967262295724 - 0.000836080413942778i	0.000851488182799722 - 0.000685557443823332i	0.000918166050795551 + 0.000544024565068602i	0.000229984480370919 + 0.000958990239356677i	-0.000996357263391607 - 0.000485365398178671i	-0.000836417974258048 - 0.00166675672132256i	0.00202125013667281 - 0.00143238066193542i	0.000195877870875254 + 0.00121022967671766i	-0.000286119295417962 + 0.00180692851157245i	0.00122643363582786 - 3.02518722782699e-06i	-0.00196044401742566 - 0.000259929506953958i	-0.00191791340193973 - 0.000727622412927454i	0.00181433559537187 - 0.00126165484876151i	0.00114900731964414 + 0.000415971801687315i	0.000678702776214699 + 0.000894966762736053i	0.000144961722143924 + 0.000194947127938195i	-0.00255905862835511 + 0.000841198264659648i	-0.000516444003149752 - 2.52437803138938e-05i	0.00158926286202577 - 0.00169697215000077i	7.70350862460704e-05 + 0.00102782565666718i	-0.000681884409977005 + 0.00228030286378376i	0.000876634482715940 - 0.000137045948782475i	-0.00140818457263295 - 0.000374428846731237i	-0.00166616119530105 - 0.000958800765196665i	0.00159032978498451 - 0.00169034151533305i	0.00123315184017382 + 0.00125538765810535i	0.000463542386961532 + 0.00145266891237195i	9.84577172695790e-05 - 0.000676642799474651i	-0.00227937212084670 + 0.000673306988884581i	-0.000990271611295134 + 0.000124504365933278i	0.00162610626287299 - 0.00192765376301053i	0.000695328897771777 - 0.000336827840229236i	0.000731418352750007 + 0.000632722891686135i	7.35825390878511e-05 + 0.000967854254803918i	-0.00197041831405037 + 0.00171593216290689i	-0.000921633980734663 - 0.00100770711809971i	0.00123741737211753 - 0.00197034097425066i
-2.09629344408305e-05 + 4.51966478133339e-06i	6.28964137981174e-05 - 0.00205556468963205i	-0.000217249371866284 - 0.00150818243852243i	0.00164529325944995 + 0.00207576384335583i	0.000578768841118111 + 0.00103853927567650i	-0.000905780257568508 - 0.000324369788673969i	-0.000630023111184933 + 0.000666271901302856i	-0.00163949829421901 - 0.00125585344797239i	0.000258952202643553 - 0.00135029628951264i	0.00301448785221510 + 0.00102050330709649i	0.000179212241329227 + 4.80482135036152e-05i	-0.00155801444167741 + 0.000392903483504584i	-0.000284861389955782 + 0.00170505221505487i	-0.00103082161018762 - 0.000904849514631455i	8.58582154798078e-05 - 0.00175734067126254i	0.00177532263834996 - 0.000387820878077252i	0.000435767216062653 + 0.00145221456834296i	-0.00125782661043917 + 0.000198012383442732i	-0.000188030520224020 - 0.000180907702788411i	-0.00129945189724156 - 0.00156821062849329i	-0.000106354876471359 - 0.000951451082379486i	0.00310962428252168 + 0.00125625463413918i	0.000236698606426817 + 0.000503404982278611i	-0.00177533257447803 + 4.39881549237898e-05i	-0.000199824792397599 + 0.000953516617741075i	-0.00132429575737950 - 0.000504148724718446i	0.000179976959851355 - 0.00154322191908560i	0.00269552818857090 - 0.000547321780458893i	-0.000300226333762269 + 0.000413114313906217i	-0.000992782766714290 + 0.00178029092744987i	0.000455518180304433 + 0.00119430549972519i	-0.00137295835211699 - 0.00151003498910812i	-0.000399040760303882 - 0.000441082742330572i	0.00269507962766182 + 0.00124913234656152i	0.000393581991304462 + 0.000903104939099603i	-0.00176712831294188 + 0.000108612738093304i	-0.000221345777149690 + 2.49358097300446e-06i	-0.00142446871907814 - 0.000441937317706417i	0.000167359168241242 - 0.00101626736730605i	0.00327373857014544 - 0.000561582172429577i	-0.000311047374452088 + 0.000728276799773726i	-0.00176860153693910 + 0.00144340221152007i	0.000426228415972207 + 0.000657053858729350i	-0.00106621963139168 - 0.000808205150358829i	-0.000267791166342905 - 0.00155031597434289i	0.00169432709365178 - 0.000906719317399718i	-0.000110016006630710 + 0.000921037053961961i	0.000560651429492514 + 0.00191854717128386i	-0.000324773636416491 - 0.000939707085070465i	-0.00127771607275260 - 0.000768039268405472i
-0.000271952077180968 + 0.000886592302310841i	-0.00161800965672048 - 0.00205029536696701i	-0.00108391136984971 - 0.000133477562999945i	0.00117052381643655 - 0.000387389460730309i	0.00185095360970883 - 0.000699590046941673i	0.000389104366221438 + 0.00181262399121620i	-0.000992645317176406 + 0.000303748501334904i	-0.00136507293205499 - 0.000378984239873078i	-0.000621294716940940 + 0.00105701812001223i	0.000797905591021649 - 0.00213575905839890i	0.00125976093693671 - 0.00183758925557043i	0.000388320203667370 + 0.00252571521529813i	-0.000427727513135936 + 0.00109882349292617i	-0.000560946575074443 - 0.000130364824156138i	-0.000567220368759790 + 0.000336688037895407i	-0.000579938922709968 - 0.00232267982535336i	0.00101326472311897 - 0.000212647865064287i	0.000934458535151365 + 0.00174325986488847i	-0.000807173023091592 + 0.000265821259139983i	-0.00209532607602715 - 0.000871252242225991i	-0.000332490987988729 + 0.000760761070436162i	0.00112816720558952 - 0.00150726913144248i	0.00129106629315528 - 0.00156654248604311i	0.000642991721305508 + 0.00224728155249166i	-0.00114254353379730 + 0.00101419546605604i	-0.000991129748105806 - 0.000192859024926244i	0.000253647931237596 + 0.000444504393050161i	-0.000458081112845819 - 0.00235879794345203i	0.000196845822862209 - 0.00129141415057178i	0.00177256671681238 + 0.00245713740278272i	0.000314152710097745 + 0.000773316891476862i	-0.00112099817855490 - 0.000110686164415218i	-0.000110796424410389 + 9.40600428581349e-05i	0.00145104048686692 - 0.000799104495670369i	0.00106111452529564 - 0.000889381302554491i	0.000934002920129195 + 0.00171979557004060i	-0.00142617958269356 + 0.000795045706045851i	-0.00165380361241581 - 0.000151107819911760i	0.000779847756193323 + 0.000365722614665063i	-1.26158143604636e-06 - 0.00213830908441801i	0.000169411824566749 - 0.00144012977948220i	0.00175802765825342 + 0.00240864738016529i	-0.000439588894638711 + 0.00132641211066554i	-0.00120204616836218 - 0.000318386855816167i	-4.13678203251283e-05 - 0.000299896208756797i	-0.00120408357894983 - 0.00165287286947876i	0.000386407502117595 - 0.000347469803884288i	0.00265777827479559 + 0.00125041583470571i	-0.00128007437666436 + 0.000456214986025464i	-0.00234466518820966 - 4.85745042215964e-05i
-0.00159575483100789 - 0.00141026712791931i	-0.000920208473040289 - 0.00153085957387192i	0.00253809940875740 + 9.03388425440669e-05i	0.000503084061305214 + 0.00137886364330063i	-0.000299775367950390 + 0.000936822781516877i	-3.64839048694670e-05 - 0.000211936200330281i	-0.00250684669758772 - 0.000451829727194945i	-0.000210105391809472 - 0.000362764772661309i	0.00253758468799692 - 0.000843624714225223i	0.000279182157730165 - 0.000400739282662715i	0.000173133024880824 + 0.00120876605368559i	-0.000419940480717583 + 0.00146069095460359i	-0.00226579297871008 - 3.44777825804890e-05i	0.000729685602008708 - 0.00128887368081483i	0.00120550761291566 - 0.00138056332365096i	-0.000992426626200277 - 0.000209174648872417i	-0.000590481647435649 + 0.00124881710686324i	0.000337038589955693 - 0.000963657378465630i	-0.00221757211234387 - 0.000482094112948892i	-0.000645564564093334 - 0.000425647348798514i	0.00269344971474808 - 0.000912570659281522i	0.000719781939380961 + 0.000594652671179133i	-0.000231260079478985 + 0.00105552705870588i	-0.000691105667780107 + 0.000397067697015291i	-0.00220642400016162 + 0.000368441515147395i	0.000698359793095733 - 0.000991931607237510i	0.00173448388889425 - 0.00169982271066545i	-0.000700636025138249 + 0.000108113321627382i	0.000911639916344468 + 0.00133825831588650i	0.000532664888898472 + 0.00147191205616363i	-0.00230720447484764 + 0.000288209110898590i	-0.000133595829590405 - 0.00202043902285192i	0.00243658465845965 - 0.000980800549741415i	0.00102823143665037 + 0.00151655055462055i	-0.000463664866705197 + 0.00112138447954292i	-0.000888874731024490 - 0.000746917639640764i	-0.00197045700918877 + 0.000514060462543951i	0.000443297442968222 - 0.000528515442780520i	0.00201883435780951 - 0.00191913131376306i	-2.20589502558618e-05 + 0.000463966616404408i	0.000227122664020695 + 0.00131030128452289i	-0.000161359155758968 + 0.00102730069371332i	-0.00187351459632558 + 0.000663652693372412i	0.000227448449263186 - 0.00214055214716624i	0.000815272892527858 - 0.00170698514176388i	-0.000429091450517855 + 0.00140222060555127i	0.00165383372839316 + 0.000689864160616308i	0.000788423159540957 + 0.000495690451422558i	-0.00160644574772993 + 0.000329887388605381i	0.000156664205081771 - 9.14725882172467e-05i
-0.00170677788035687 - 0.000942109370991104i	-0.000467797005220866 + 0.000522206014407445i	-0.000651634099339816 - 0.00118745242733477i	0.00125035625369721 - 0.00103967380191867i	0.00257068913040908 + 0.00119104798631430i	-0.00111013288095560 + 0.000376784336918444i	-0.00190579329180108 + 0.000745784822877689i	0.000212499715470163 + 0.000893523922400090i	-0.000387223984080706 - 0.00197024974778176i	0.000435400878890932 - 0.00142672016780391i	0.00145275001270467 + 0.000677336097853385i	-0.000212715974026689 + 0.000732606852018790i	-6.47646123775312e-05 + 0.00181701124468837i	-0.000375853593981392 + 0.000245058517905979i	-0.00187310238295530 - 0.00265792340858375i	0.000358153493741662 - 0.000306969474907417i	0.00290441800983475 + 0.00133920910545750i	-0.00121234920147206 + 0.000457240199936670i	-0.00232222041155988 + 0.000138059072177954i	0.000399256452873553 + 0.000495039689644048i	-0.000408607542612116 - 0.00121545925964218i	0.000684356081083984 - 0.00142499973280472i	0.00205897825987126 + 0.000305318009746692i	-0.000942906600639620 + 0.00122476990336082i	-0.000821459703779077 + 0.00165202823388939i	0.000296437685784048 - 8.60658275352993e-05i	-0.00149325047103954 - 0.00232128966862283i	0.000257090427138612 - 0.000728061107204059i	0.00173492845001976 + 0.000843069873529638i	9.56663777329076e-05 + 0.000420884213659093i	0.000652288883551684 + 0.00110005509728822i	-0.000959472317990911 + 0.000386063596553584i	-0.000386305141425002 - 0.000625858315661145i	0.000862190180384289 - 0.000996441649701319i	0.00253830667016441 - 3.64976359191775e-05i	-0.00136693354946692 + 0.00147197820719022i	-0.00164127362790651 + 0.00140320408257527i	0.000718181897405187 - 0.000463186842707999i	-0.000916958116920050 - 0.00169736639934030i	0.000196312281855480 - 0.00101421187239324i	0.00175317587573875 + 0.000365824975357662i	-0.000255235766440437 + 0.00138165937076186i	0.000299969503344068 + 0.00120897331509260i	-0.000513055044607170 - 0.000409326656168539i	-0.00273217427976847 - 0.00137597604253661i	0.000980936244386428 - 0.000534207878540173i	0.00245104428506102 + 0.000209325257016715i	-0.000340979526468348 + 0.000197243024792537i	-0.00225765048433713 + 0.00111682617481949i	0.000754006020874989 - 0.000871326996429798i
-0.000850276546047134 + 0.00217253270821836i	-0.00153949642482460 + 5.22436407689949e-05i	-0.000662552703851174 - 0.000807153686889289i	0.000321601941192832 + 0.000365927374832328i	0.000899355259868437 - 0.00223855663841874i	0.000800735062086860 - 0.000544518044873004i	0.000135692573274778 + 0.00332748834938731i	-0.000560546048119851 + 0.000435397918384851i	-0.000843562511025157 - 0.00111557413141703i	-0.000569993042447418 - 0.000287106648879237i	5.34758011685693e-05 - 0.00178883607778794i	0.000989264024029256 + 0.000320671198255771i	0.00148642652163607 + 0.00202667281994604i	2.50488544954275e-05 - 0.000450942354054898i	-0.00199815499431550 + 0.000399164440699666i	-0.00139300481168323 + 0.000398377114463197i	0.00127057217296613 - 0.00172995751152525i	0.000656113292696983 - 0.000625925159390195i	3.75863668888186e-05 + 0.00308913371762534i	-0.00130242840305214 + 0.000531949755616778i	-0.000718040516797995 - 0.00121698089880360i	0.000452745510414755 - 0.000305763217455157i	-0.000248030398836169 - 0.00184188168417659i	0.000651678764617358 + 0.000143824376536581i	0.00173088825446230 + 0.00262576357182772i	-0.000501392400687413 - 9.60168240856812e-05i	-0.00183745630148358 - 0.000481882823488755i	-0.000795421623041669 + 2.69049520196737e-05i	0.000258057736220554 - 0.00167564741009637i	0.00163473341464836 + 0.000187447925044860i	0.00132413228249817 + 0.00100435937710919i	-0.000897502262257299 - 0.000474604609319407i	-0.000917596201133964 - 0.00104130430834670i	0.00133453446263090 - 0.000389226144662924i	-0.000125934602850334 - 0.00174709399888488i	0.000245067707412791 - 6.49391676325241e-06i	0.00169881116954119 + 0.00283493858448603i	-0.000985773964555306 + 0.000401732185282423i	-0.00163229634759379 - 0.00110646667411605i	1.67931278557042e-05 - 0.000513184302857206i	-0.000288029046725105 - 0.00118106806855885i	0.00134683303796130 + 0.000375611300047859i	0.00201239158425477 + 0.00120303559434287i	-0.00124589585918210 - 0.000272681694265632i	-0.00170865521054926 + 0.000945133283820477i	-0.000400801442345366 + 0.000369417434306276i	-2.08508859615618e-05 - 0.00238442646437645i	0.00176486171899896 - 0.000502676062521875i	0.00136254715362717 + 0.00257833878418608i	-0.00136583444965794 + 0.000825356452095349i
0.00102762230405845 + 0.000290796028196375i	0.000312744660826348 + 0.00119417118916217i	-0.00184212464511710 + 0.00196636265344702i	-5.63467308976420e-05 - 0.00114008273651936i	0.000224098751191324 - 0.00210513180638324i	-0.00105298260447269 + 0.000158702246147082i	0.00169836429538565 - 8.83229192896919e-06i	0.00176979831370373 + 0.000874665825529929i	-0.00141707940213314 + 0.00178130018977917i	-0.00119510193209922 - 0.00104244673803524i	-0.000839045093369412 - 0.00108999452833444i	-0.000111594679622395 + 0.000463122459479933i	0.00236860367380813 - 0.00110523460388049i	0.000800220916435956 - 9.53757111743113e-05i	-0.00132013790526423 + 0.00196366188075554i	-0.000356916423851508 + 0.000517408537758372i	0.000467379445362352 - 0.00246505296180482i	-0.000368504726970821 + 0.000130365038085935i	0.00116774124020858 + 0.000166028711629095i	0.00120186236002022 + 0.00105273258848264i	-0.00108858636144773 + 0.00212248876705706i	-0.00117525081973645 - 0.00161070312749844i	-0.000668835662243204 - 0.00169572116019193i	1.58721784068268e-05 + 0.00104205826028440i	0.00194558377142724 - 0.000784297970779402i	0.00119896831698587 - 0.000105032859545930i	-0.00112363560492747 + 0.00212666440279162i	-0.00131803017385254 - 0.000127107837172974i	-0.000870098991111700 - 0.000570836959769302i	0.000484419753561677 - 0.000421572934015734i	0.00169479041725488 - 0.00202402706110479i	8.52592997932090e-05 + 0.000768002295189484i	-0.000733174235125763 + 0.00222126241171759i	-0.000909898306707459 - 0.00171106075617148i	-0.000580063683613202 - 0.00222501286924218i	0.000264929167712900 + 0.00115929712164913i	0.00144165707912779 - 0.000293044870933283i	0.00124706439371109 + 8.02609376065921e-05i	-0.000681512983880598 + 0.00213995274413804i	-0.00200275479725547 - 0.000740434298098968i	-0.000892292214524392 - 0.000998471820495664i	0.00119331135449306 + 0.000342491469237900i	0.00147133498352146 - 0.00170634705754997i	0.000195894277212458 + 0.000263998424775838i	-0.000459085245849379 + 0.00256897463920539i	-0.000599730127984165 - 4.61302243067039e-06i	-0.000810619389066225 - 0.000418041116455708i	-0.000217172595199408 - 0.00104383163467242i	0.00100701269457276 + 0.000236425955822260i	0.000844211831566254 + 0.000472547474303247i
0.00138387101253520 - 0.000975514653585195i	-7.52519258876094e-05 + 0.000705075657289631i	0.00118855338132958 + 0.00177212357849666i	0.000330690971542828 + 0.000574687216502446i	-0.00298833147168500 - 0.000943536816538853i	-0.000302866384778762 - 0.000757567182046898i	0.00152516430668907 - 0.000264198777824798i	0.000164849215232918 - 0.000304897310175117i	0.00172764477036786 + 0.000256553452457588i	-0.000185606466912057 + 0.00117642549025415i	-0.00310145693356847 + 0.000925081513904691i	0.000382919676795924 - 0.000628232191040213i	0.00120883440190875 - 0.00165936127449180i	-0.000494822593898462 - 0.000820615786457184i	0.00139048215176156 + 0.000771486420968348i	0.000305828053112178 + 0.00152004061409450i	-0.00230214666146432 - 0.000788834326285801i	-0.000455353882365993 - 0.00112382154659748i	0.00138004980527648 - 0.000594007770713104i	0.000314784331310509 + 0.000671470846438455i	0.00166227136860488 + 0.000452254577785354i	-0.000189873604076448 + 0.000562853022205264i	-0.00333975646163510 + 0.000819515609666518i	0.000186060864183001 - 0.000904074477025762i	0.00174775748886885 - 0.00134453976816595i	-0.000205148650595720 - 0.000190056296996094i	0.00111175717239153 + 0.000127660029331118i	8.22070392822684e-05 + 0.00144106770524727i	-0.00180744597664694 + 0.00166320211154194i	0.000189277094577401 - 0.00131719116415406i	-0.000300046419288941 - 0.00208807904549335i	-0.000425258878046052 - 7.74110032418895e-05i	0.00134348720984685 + 0.000990644590749486i	-0.000257081817061671 - 0.000129975147719880i	-0.00302722827178730 + 0.000531762754012437i	-0.000126985634354584 - 0.00103473720721390i	0.00183069324897662 - 0.00114362761695281i	0.000321540001742559 + 0.000516216867450123i	0.000931295235418234 - 0.000219194873342053i	-0.000244128827246515 + 0.00102699695019049i	-0.00211692796468625 + 0.00209716509556757i	0.000129044404782823 - 0.00161227321592326i	0.000595554806065171 - 0.00227509815500464i	-0.000216940208927856 + 0.000392483556022989i	0.00140709948437770 + 0.000501359893904809i	0.000442706295132919 + 0.00127914689504094i	-0.00110977532385115 + 0.00119659282078813i	-0.000509247548512067 - 0.00149651860319187i	0.00145309652630431 - 0.00109336295132003i	0.000944365266618512 + 0.00116634086638018i
-0.00150358852990687 - 0.00165059305400835i	0.000531123540193632 - 0.000269444326370716i	0.00260646368816639 + 0.000809226037213354i	0.000141718109591085 - 0.000373208087933555i	-0.00108018496882629 + 0.00125365371987730i	-0.00112648504624180 + 0.00113106225600713i	-0.00115056388998038 - 0.00174886437462538i	0.00139070548052913 - 0.000838275973675341i	0.00138712118658347 - 0.000174255174835055i	-0.000689478836212329 - 0.000426483353104743i	0.000519744159979847 + 0.00234116610279650i	-0.000144541313744863 + 0.00139410788553645i	-0.00200733160559802 - 0.00220646834276305i	0.000224129142854459 - 0.00112741578917886i	0.000996734257842718 - 2.32463299027714e-05i	0.000318806783297763 + 0.000139028064387376i	-0.00135276620254700 + 0.000619476247101931i	-0.000819926860042107 + 0.000233590866238104i	-0.00139752780973684 - 0.00116401382718963i	0.00141080410260034 - 0.000596171167844083i	0.00208936253363753 - 0.000262745066422712i	-0.000919753978715850 - 0.000142473311151976i	-9.83425687087272e-05 + 0.00198605883538936i	-0.000236933825015995 + 0.00129512263051195i	-0.00187186602304729 - 0.00187051560422542i	0.000892692507698660 - 0.00157360474576283i	0.00116494457012669 - 4.23364108752569e-05i	-0.000531146392233526 + 0.000658673985817676i	0.00151442248256447 + 0.00156989334325996i	-0.000120998556272918 + 0.000409579376355958i	-0.00294498199797241 - 0.00105594946200710i	3.38475666812509e-05 - 0.000502231410385896i	0.00266223490969711 - 0.000356713517617266i	-0.000786542265208364 + 0.000349107383974398i	-0.000816395042482085 + 0.00152863000886601i	-0.000417332383304474 + 0.000747949185264655i	-0.00157846060430674 - 0.00124408610317664i	0.00133537032800420 - 0.00164002281849252i	0.00143562392861226 - 0.000354032267794361i	-0.00109161097872876 + 0.00108324676289368i	0.00110884363439993 + 0.00153491734961951i	0.000170361806403177 + 0.000465135150933391i	-0.00285796336393781 - 0.00107986690990697i	0.000209657708033715 - 0.00137625554588752i	0.00150938368854653 - 0.000249490407113544i	0.000387633042547162 + 0.000817620926325773i	0.00148031564173113 + 0.000681946042891539i	-0.00108231601995662 + 0.000263580420132821i	-0.00118842933001672 - 0.000548095869493664i	0.00151508844501826 - 0.00129750266929314i
-0.00175262154498352 - 0.000393035638442104i	-3.86865436794897e-05 + 0.000745445337908231i	0.00116984034699472 - 0.00210849277156134i	0.000893541362726555 - 0.000836604643177419i	0.000332712846174351 + 0.00189478288058607i	-0.000329385229122344 + 0.000654872585897449i	-0.000982734637866744 + 0.000962521965510744i	-0.000642373359422812 - 0.000487626623637949i	0.000127738053072207 - 0.00308159174217672i	0.000506944438037129 + 0.000479062857998935i	0.000982209397624578 + 0.00192351823271544i	0.000835673900240365 - 0.000461650036135030i	-0.000767465320508460 + 0.00108484296295702i	-0.00190655000203921 + 0.000190083961255227i	-0.000699050098085854 - 0.00231206799293856i	0.00144654978622099 + 0.000315233533875561i	0.000844884516361162 + 0.00187513211956730i	-0.00141045143464577 + 0.000626521668889243i	-0.00130614980271565 + 0.000550669163298716i	0.000320942922784485 - 0.000292751741753730i	0.000162335074917848 - 0.00283292325152957i	0.000481019739186634 + 5.55579856848824e-05i	0.000969698198880392 + 0.00211017431706153i	0.000117918094191460 + 8.87529154916650e-05i	-0.000519940720705716 + 0.000843953773424104i	-0.00137865178567191 - 0.000283133874568166i	-0.00107013835367629 - 0.00255782721885741i	0.00162208509682554 + 0.000584414790209371i	0.00187531635823119 + 0.00112125823750089i	-0.000320855571054782 - 0.000847950458006567i	-0.000857784541116172 + 0.00148744760055881i	-0.00121503628942843 + 0.000871595979912184i	0.000275328478085960 - 0.00219648842500761i	0.000460829299860157 - 0.000375020152212559i	0.00110333255029642 + 0.00192557408731779i	-0.000714589360414177 + 0.000759870292521836i	-0.000592290664723108 + 0.000625476590047077i	-0.000496524103648072 - 0.000787858407126916i	-0.00117456456142329 - 0.00251631640373643i	0.00141042763538119 + 0.000603138877430472i	0.00193301655758273 + 0.00160466183315777i	-0.000583903010370485 - 0.000496777593438219i	-0.000596603890124583 + 0.000838034964926518i	-0.00127761969420026 + 0.000537800415531187i	-0.00137915447576780 - 0.00171857403865987i	0.00214304980598850 - 0.000497454846585126i	0.00176418628695377 - 4.72470013456839e-05i	-0.00112260806780805 + 0.000158750219239427i	-0.000954774442555310 + 0.000464591461299591i	0.000491678958436438 - 0.00125497143216993i
-0.00198043692694421 + 0.00279672054622793i	-0.000309098193998083 - 0.000291815285774820i	7.00139405889516e-05 - 0.00181253302130936i	-0.000642901178390320 - 0.000569429527307534i	0.00125223912798198 - 0.000785577910107088i	0.000895943577738664 + 0.00106190013025888i	-0.000166424229802505 + 0.00209555182011552i	-2.48234023372977e-06 - 0.000588406402193974i	-0.00204304266050721 - 0.000854153553007448i	-0.00106337611308676 - 0.000308167451061024i	0.00256466313809202 - 0.00105730361948866i	0.00108889871768512 + 0.000608776237751432i	-0.000543755444964721 + 0.000988767260557089i	-0.000104293236960504 - 6.29795848443809e-05i	-0.00183025423474562 + 0.00116254596739070i	-0.000663983373751392 - 0.000520231741912144i	0.000839768831474896 - 0.00113873205439718i	0.000635610792174805 + 0.000910387496902826i	-0.000237631866826325 + 0.00287729585505204i	-0.000408971139894175 - 0.000849646330147898i	-0.00140140548987963 - 0.00160338894655677i	-0.000631944792264480 - 0.000101916240242329i	0.00179051307855758 - 0.000866751219671595i	0.00123897297525493 + 0.000899892234549465i	-0.000112945361744574 + 0.00135923802185247i	-0.000646915629477939 - 0.000693722562897006i	-0.00191837269246900 + 0.000719975026472050i	-0.000479323867045308 - 0.000143673554524269i	0.00212113834823519 - 0.00265379526582499i	0.000855594125963046 + 0.000494338581672287i	-0.000488440179189990 + 0.00179144382149464i	-0.000147762117766804 + 0.000111655415177323i	-0.000760402275164418 - 0.00215218549595739i	8.74964145407147e-05 - 1.19426143798751e-05i	0.000907977458710382 - 0.000690926701101208i	0.00108189801531360 + 0.00101462987703626i	0.000449973788108985 + 0.00184643614623048i	-0.00113103662675210 - 0.00103716500921813i	-0.00192698393489238 - 9.83844226823072e-05i	-0.000121449933896707 + 0.000113444206760773i	0.00188688791058749 - 0.00208937247235762i	0.00126433239032524 + 0.000605245816219136i	-0.000435356672835554 + 0.00166165534443110i	-0.00101556061997332 - 0.000273293383547984i	-0.000719118586152864 + 0.00120210390489165i	-0.000214512406923622 - 0.000611567436374525i	0.000361856290107196 - 0.00325631728996419i	0.000845478955822272 + 0.000836156959401660i	0.000921780628547994 + 0.00226648143213164i	-0.00146797509502088 - 0.00106163196067813i
-0.000585415115196930 + 0.000440693243282916i	-0.000338895462112287 - 0.00255447131821776i	0.00173422657266235 - 0.000593134573830538i	0.000843773167950513 + 0.000790880988228801i	-0.00104613766606139 + 0.000455025402912727i	0.000516112926963845 + 0.00194822467908432i	-0.000483421024499030 - 4.68284215686242e-05i	-0.00199951108451119 - 0.00259607967782237i	0.000888640111788892 - 0.000321943247772040i	0.00159686442491938 + 0.000620027700470754i	0.000327836988460642 + 0.000405256375469150i	0.000461508787716559 + 0.00136152256962894i	-0.00158130877684949 - 0.000292459780340673i	-0.00194915542202137 - 0.000839078471897737i	0.00117414598164623 + 0.000268709092283636i	0.00134440226168062 - 0.00148004189413361i	-0.00169022186103257 + 0.000643798551708681i	9.85678784848502e-05 + 0.00173263010386915i	-0.000167243406108090 + 2.96965540124176e-07i	-0.00173836723830928 - 0.00250730608913807i	0.00132560652909647 - 0.000856231555802704i	0.00139339738939729 + 0.000993396483123889i	-0.000473419929910404 + 0.00103960352023135i	0.000831554395280827 + 0.000939611892976557i	-0.00116154795338710 - 0.000437832085087205i	-0.00248630798958987 - 0.00102771549545191i	0.00135489443332146 - 0.000168174149045145i	0.00175517597235541 - 0.000611049678231674i	0.000336762365425132 + 7.39291129547150e-05i	0.000335936871947921 + 0.00165686925682218i	-0.00199721041352973 + 0.000485503232672639i	-0.00120490947834646 - 0.000497415801912376i	0.00162789766362864 - 0.00117394806579528i	0.00121976995581465 + 0.000907343258627379i	-0.00116800703506400 + 0.00163948073277268i	0.000845268959002807 + 0.000710149384226456i	-0.000621920521486724 - 0.000605407822627436i	-0.00262671925985864 - 0.00113505288782793i	0.00133977116809768 - 0.000734368548625305i	0.00198814841439087 + 0.000157649949035283i	4.66305057176748e-05 + 0.000875767546845976i	0.000344334157514377 + 0.000700300765437076i	-0.00190295260019758 + 0.000161326320007805i	-0.00166907254680950 - 0.000112337934295569i	0.00193437801982064 - 0.000887218106856622i	0.000617303486149497 - 0.00137432948391328i	-1.93093370954128e-05 + 0.000213487794160916i	0.00119754144982630 + 0.00198721767145381i	-0.000181943877306048 - 0.000826274744665372i	-0.00225211685519182 - 0.00112172002277310i
-0.000344916287597270 + 1.11337476648162e-05i	-0.000928000152289052 + 7.47549633008987e-06i	-0.000603717762994464 - 0.00116822626815387i	0.000545008922318201 - 0.00237337366631012i	0.00112521836229605 + 0.00174499997455001i	0.000855961138313098 + 0.00184936807393179i	-0.000221621550419797 - 0.00108551801482603i	-0.00150351913104326 + 0.000788596185522875i	-0.00134010394485802 - 7.96187022273698e-05i	0.000510273905348334 - 0.00218038992823441i	0.00192190415387459 + 0.000522565610942303i	0.00101818226744854 + 0.000545939665255259i	-0.000992869857767344 - 2.09919778155314e-06i	-0.00132989888355421 + 0.00210763855445486i	-0.000243815340245781 - 0.000485093417844686i	0.000169010707775503 - 0.00246244229362631i	0.000801590008127269 + 0.00155980159845437i	0.000795597853060613 + 0.00223511210416635i	-0.000581218197907254 - 0.000828369225589667i	-0.00103360606493119 + 0.000228960059880183i	-0.00114010872268214 - 0.000445503355699419i	2.32473890796638e-05 - 0.00206401831632255i	0.00236135322464342 + 0.00102539126173790i	0.00112270438862530 + 0.00102017960744314i	-0.00156073234139143 - 0.000553601390734317i	-0.00110779454408874 + 0.00154772796984328i	-0.000423308190552090 - 6.17490075296818e-05i	3.45118075447067e-05 - 0.00236293942000300i	0.00140442651828246 - 0.000182501829383760i	0.000735048119129350 + 0.000288544974449558i	-0.000507641860059475 + 0.00110896344869806i	-0.000266501721722428 + 0.00224898776256206i	-0.000502926094958956 - 0.000977165939069970i	-0.000395568235592218 - 0.00176110157140096i	0.00227652839192170 + 0.00135237719365492i	0.00129010249957474 + 0.00141565997070839i	-0.00186334322321677 - 0.000732510202336554i	-0.000926095822171769 + 0.000772392462600502i	-0.000532150727998260 + 7.02738893527449e-05i	-0.000236206687570714 - 0.00196648155970523i	0.00230649929414178 - 0.000239454227534066i	0.000803494678102579 + 0.000563354926990824i	-0.00161767477902481 + 0.000947558194728500i	-0.000163270194763037 + 0.00180785190125316i	-0.000393773171600212 - 0.00110966533749605i	-0.000773323205537555 - 0.00228128722103335i	0.00105704367072486 + 0.000219979388784404i	0.000714804143563480 + 0.000283262502806863i	-0.00189400969919682 - 0.000477268714766337i	-0.000815948189078108 - 2.13563442248686e-05i
0.000496929160289240 + 0.00135527736103065i	-0.000906764614818107 + 0.00113083782684059i	-0.000547089671183007 - 0.00126740625213795i	-0.00173066463814339 - 0.000562473018902916i	0.000277317376516864 - 0.000187061189170553i	0.00308524790828301 - 0.000965394713480236i	8.22227057796600e-05 + 0.00109142476525150i	-0.00152100550001386 + 0.00121946359611780i	-0.000228993987093881 - 0.000256748725431478i	-0.00112990708390354 + 0.000448426784043479i	0.000140088692060344 - 0.00129921978796567i	0.00181415043504467 - 0.00225013382852096i	-7.64106782543362e-05 + 0.00160665073158867i	6.47155089719781e-06 + 0.00212764101498463i	0.000237545431941701 - 0.000183074879590235i	-0.00173721299779622 - 0.000268615724068504i	0.000449619541122003 + 0.000393362146359930i	0.00244625819745210 - 0.000561968287766766i	0.000417817089752272 + 0.00117889281834895i	-0.00131321456537902 + 0.00111164920785474i	-0.000894421295718448 - 0.000908292618254867i	-0.00101461948406937 + 0.000496921804511226i	0.000530479624525121 - 0.000793742657476040i	0.00199639422108720 - 0.00238116904572013i	0.000126107044017644 + 0.00170129695726376i	-0.000767365067305043 + 0.00218278633002720i	-0.000221285925050574 - 0.000541106072830771i	-0.000846351622484838 + 1.57556318141822e-05i	-0.000344097157690494 - 0.00141217069739687i	0.000629361569425540 - 0.00176829736979009i	0.000794673400413094 + 0.00188567102338671i	0.00125385148564252 + 0.00124426410430454i	-0.00153001991426747 - 0.00142346615176976i	-0.000998639055745992 + 0.000112821025635557i	0.00100287673479083 - 0.000206722078723431i	0.00191953152853345 - 0.00201585904500708i	0.000358149302328640 + 0.00153463739313692i	-0.00115796600263715 + 0.00200169919859235i	-0.000921470112972903 - 0.000769653109037629i	-0.000179372794161211 + 0.000218769707634857i	9.44959545765591e-05 - 0.00126472232889757i	0.000404928376042867 - 0.00225102883169135i	0.000960399964444150 + 0.00212916010872760i	0.000660667646145498 + 0.00192046227147051i	-0.000782507276354258 - 0.000769168257748966i	-0.00148223000821478 + 9.37114135046110e-05i	-0.000559680246034182 - 0.00118494198039779i	0.000738837185663519 - 0.00113829595674426i	0.000506190271860445 + 0.00125137699874187i	-0.00108158420383192 + 0.00159299446339536i
0.000640702609629295 + 0.000481957989716468i	0.00173194812628757 + 0.000599774371769153i	-0.00127448235847460 + 0.000469846756064626i	-0.00239475615070594 + 0.000649306887405280i	0.000804665015801824 - 0.000251656017105551i	0.000243147247679674 - 0.00170992939506675i	0.000450215648354088 - 0.00100207168902084i	0.00184259707624488 + 0.00117150817368615i	-0.00123408810649913 + 0.00176802016970690i	-0.00111924356214672 + 0.000480270710145814i	0.000859486599007184 - 0.00101101049104971i	-0.00160691378070365 - 0.00143583298812289i	-1.36415682643461e-05 - 0.000524305181391378i	0.00296231917101211 + 0.000760896649358099i	-0.000124211684915924 + 0.00120389353407481i	-0.00117243891662321 + 0.000487405677383292i	0.000443997421984190 - 0.000873649928217219i	0.000931346781860406 - 0.00124595998718023i	0.000733273020530770 - 0.000222482651725586i	0.00145959882193215 + 0.000492533137541270i	-0.00149211545553401 + 0.00161990760330805i	-0.00141931334069971 + 0.000888858123552333i	0.00107899196959943 - 0.00136314744068495i	-0.000946970679679964 - 0.00143195999095757i	-8.52732343658272e-05 - 0.000513609471314187i	0.00257493018437343 + 0.000666049196490510i	-0.000295266749952839 + 0.00198566279647613i	-0.00124621102326199 + 0.000333315447995389i	-0.000264716204446466 - 0.00149304619847106i	-0.00164098824033500 - 0.000291995780622098i	0.000843678250307377 - 0.000172685446542323i	0.00276129334602938 - 0.000683498812255073i	-0.00150801926352243 + 0.00111178379139999i	-0.00165478796966540 + 0.00130409979560280i	0.000862781196195253 - 0.00156795553877574i	-9.24279253604287e-05 - 0.00144492865534854i	0.000187776998440055 - 0.000276894679140111i	0.00182878771432132 + 0.000422749359588559i	-0.000536578430188273 + 0.00236978866241342i	-0.00116503722669863 + 0.000508173256797044i	1.44995825367733e-05 - 0.00226169714924315i	-0.00130316905266575 - 0.000299596570803818i	0.000440637978698133 + 0.000110651079412587i	0.00269660607149029 - 0.000611897115738003i	1.34228117152213e-05 + 0.00151711035351187i	-0.00138167252217160 + 0.000871180821022943i	-0.00104081846522022 - 0.000801876015558171i	-0.00102592265847547 + 8.73525492467328e-05i	0.000781752292915368 + 0.000172556503994984i	0.000908620963154704 + 0.000137205070011355i
0.00200500465761505 - 0.000641599941545443i	0.00150114176361668 - 0.000537248140962437i	-0.000825876687001086 + 0.000273366436109178i	0.000107074704098785 + 0.00246733750958128i	-0.000565888420400731 + 0.000270897744470393i	-0.00119852396976096 - 0.00172508220999889i	0.000451607488671307 - 0.000640349941674724i	0.000311850274893150 - 0.000948735395365685i	0.000905071808970333 + 0.000675671302543236i	0.00149617130354548 + 0.00245874865691506i	-0.00160233663330238 - 0.000560579101631189i	-0.00194958810790286 - 0.00114531507184658i	0.000482780141250325 + 0.000560394953536034i	0.000369890811137302 - 0.00119759322682391i	0.00139248005845739 - 0.000675710071406300i	0.00146820458574326 + 0.00156352769103491i	-0.000630241454619172 + 0.000594719901700258i	-0.00136994344376372 - 0.00134737218922532i	0.00125917177201876 - 0.00132544999047834i	0.000601462296893683 - 0.000742939617591644i	-1.76717181926442e-05 + 0.00117974405290706i	0.00135135722839668 + 0.00222022678163325i	-0.00124657896126932 - 0.000400500505428508i	-0.00192744797132138 - 0.00140647483587074i	0.000657669874245101 - 0.000112492052940748i	0.000221088815288555 - 0.000616265558042999i	0.00132451924754128 - 9.60196268428279e-05i	0.00187025717766926 + 0.00135359241367635i	-0.00243142146904882 + 0.000501797472184932i	-0.00195675491420835 + 2.20238733248719e-05i	0.00135942366801155 - 0.000288972067970939i	7.75046386775391e-05 - 0.00166215038595148i	-0.000862428528240685 + 0.00159830603982090i	0.000875640656282307 + 0.00173285275222454i	-0.000786588054371419 - 0.000158330373765600i	-0.00176479520811220 - 0.00126961377572877i	0.000780664344358913 - 0.00101910804621659i	0.000262869402531731 - 0.000268514543960932i	0.000996111019353346 + 0.000776845318971984i	0.00194817290208672 + 0.00110121393335267i	-0.00235043615660356 + 0.000264889031836923i	-0.00225232194260211 - 0.000376036759859448i	0.00148766372883741 - 0.000523116186946529i	0.000312006882430392 - 0.000805872045529161i	0.000753810460846693 - 0.000548305852834290i	0.00152090431990629 + 0.000780618804210157i	-0.00190312869290875 + 0.00174978890507406i	-0.00110214467628973 + 0.000592981503225132i	0.000897877899862604 - 0.00189149849214950i	0.000477958574184642 - 0.000200608165023696i
-0.000431044910899660 - 0.000802157195202297i	-2.10325934196030e-05 - 0.00321294191502188i	0.000805539608048432 + 0.000842222304715704i	0.00111390492875124 + 0.00170321550668845i	0.000160843817694381 + 0.000129790741578417i	-0.000975464799936437 + 0.00100182361450251i	-0.00125923569669454 - 0.00104845094265575i	-0.000581620744484918 - 0.00157643855552516i	0.00106745478057219 + 0.000897925286293540i	0.00196055213907652 - 0.000538781995098028i	0.000284061069221061 + 5.18617223277137e-05i	-0.00170228476375139 + 0.00246909632761283i	-0.00125710830165603 - 0.000591286299088282i	0.000249853801639245 - 0.00149493399031401i	0.000784979075230865 + 7.00976583772679e-05i	0.000617515392942114 - 0.00153922763778329i	-0.000674728603290281 + 0.000197030061526100i	-0.000198735510130381 + 0.000825189476868357i	-0.000954614689320024 - 0.00109430099431714i	-0.00108185273828145 - 0.00204328272622959i	0.00150014917958517 + 0.000974774012049432i	0.00188876179459108 + 0.000420434913809526i	-0.000153207776441699 + 3.14850874571123e-06i	-0.00128192207817118 + 0.00168563023775100i	-0.00155222146038768 - 0.000673797860353223i	-7.30593600856924e-05 - 0.00132605307020799i	0.00161377018469472 + 0.000297062726821732i	0.000713949371157786 - 0.00134532460570634i	-1.71671187510549e-05 + 0.000541226017002125i	-0.000155137328439628 + 0.00321773199178428i	-0.00125553828469107 - 0.000670957178120121i	-0.000559346863814235 - 0.00203559996389191i	0.00174314176933071 + 0.000775966128914693i	0.00168949841620373 + 0.00131398637925123i	-0.000708615745066452 + 0.000225019701753578i	-0.000694576693530963 + 0.000775299914465701i	-0.00151013771742637 - 0.000790008643722647i	-0.000677600544234855 - 0.00112401137960016i	0.00221075734618659 + 0.000351869328144372i	0.00106923822718125 - 0.000822552437145489i	-0.000512494261489804 + 0.000413808414258901i	-0.000355063216668190 + 0.00264710530950210i	-0.00155398989894678 - 0.000443318159696555i	-0.000257550512787282 - 0.00194696646947633i	0.00154368652944337 - 0.000383854343489605i	-0.000231180019261430 - 0.000676669801297799i	0.000400260788638292 + 0.00108343978610898i	0.00134202162752307 + 0.00232091564332301i	-0.00114629562686444 - 0.000996054006869229i	-0.00129567906630692 - 0.000926811206566110i
0.000334363537717186 - 0.00127216908188024i	-0.00201591082200469 - 0.000302204668216931i	-0.000768970341898019 - 0.000576681294990749i	0.00234545693381260 - 0.00121758184173350i	0.00103995386757182 + 0.00128699403781527i	-8.92511104055057e-05 + 0.000970365173551433i	-0.000916168243520025 - 0.000314964818950204i	-0.00209164708141400 + 0.000837199215883848i	0.000518491196159517 - 0.000791919836219577i	0.00165739606707852 - 0.00201684156494174i	-0.000175448821791916 + 0.000358347218179588i	0.000698112651355921 + 0.00109377951767085i	4.23393172565437e-05 + 0.00130342573499671i	-0.00192797206684981 + 0.000869672052177534i	4.96672335803088e-05 - 0.00224513844071323i	0.000415190560061516 - 0.00157389767973558i	0.00123192198396999 + 0.00205573104088153i	-0.000204007542493971 + 0.00116736597357844i	-0.00110728966315172 - 0.00129173752509118i	-0.00175541065644320 + 0.000738294124789112i	0.000187209341077437 - 0.000379618710609407i	0.00174572611525169 - 0.00208795406356350i	0.000698950739110391 + 0.000728395181953509i	0.000100137810180802 + 0.00111237416494456i	-0.000804053624739774 + 0.000712452793592417i	-0.00143083784100334 + 0.00112532581257784i	0.000332814362508140 - 0.00206489655645010i	0.000590676072404092 - 0.00202070824181310i	-0.000138130691069017 + 0.00143959911702280i	0.00133427617784278 + 0.000619442741314922i	0.000626796216908076 + 0.000698019996173338i	-0.00186450428172722 + 0.00122745537025841i	-3.73939847834135e-05 - 0.000111008653435850i	0.00151074331599521 - 0.00189659474807358i	0.00152375748925522 + 0.00111373975227884i	-0.000225336091955645 + 0.00116983081921009i	-0.00169156631031262 - 4.66297647740396e-05i	-0.000950923509446843 + 0.00112626340029208i	0.000556684299791970 - 0.00150459867417120i	0.000643114524360812 - 0.00229557179817745i	0.000376306238805746 + 0.00129157621240979i	0.000644204972128222 + 0.000992993914316784i	1.25436216579297e-05 + 0.000770079603534504i	-0.00116890007627303 + 0.00112985530690594i	-0.00108068779530357 - 0.00244369642709528i	0.000125414015849679 - 0.00147039269982441i	0.00124112680674631 + 0.00188601765486378i	0.00133664863559441 - 0.000314492368937559i	-0.00240958358311212 - 0.000753278465698431i	-0.000597566842677726 + 0.000824259588412470i
-0.00110219816713916 + 0.000614306494245177i	-0.00222505850209907 + 0.000125836626528041i	0.000296129074196114 + 4.40986539904773e-06i	-0.000720910042602514 - 0.000685201535862478i	0.000895417465694013 - 0.00124684367436630i	0.00243101267224418 - 0.000271655337429370i	-0.00124057623074208 + 0.00152355022784821i	-0.00107671625532050 + 0.00164468151881649i	0.000513011065832432 - 0.000350068050356496i	-0.00137751404266980 - 0.00170558931172150i	0.000259062002025843 - 0.00103320428087570i	0.00164412469844553 + 0.000236696850695861i	-8.21265228268991e-05 + 0.00116071505106391i	0.000789404739107795 + 0.00117862289629882i	-0.000769872342127489 - 0.000114292856805315i	-0.00299987291767807 - 0.00107578551238344i	0.00107200260706737 - 0.000609332132616892i	0.00270682012373340 - 0.000487664478971218i	-0.00140108168990518 + 0.00163122871285836i	-0.00180956854807306 + 0.00134873580444415i	0.000621287533654680 - 0.000742414746210648i	-0.000731929206376638 - 0.00101453427359702i	0.000312371751539447 - 0.00120523743332979i	0.00164492880020322 - 0.000363842118481673i	-0.000348274760681482 + 0.00203092576965041i	0.000222366893601321 + 0.00137784992654020i	-0.000378838936912997 - 0.000883332288226760i	-0.00247501917838091 - 0.00105589066235234i	0.000741484003273590 - 0.000733903865206907i	0.00214185183367463 + 2.02009104060259e-05i	-4.64399828119634e-05 + 0.000831840941917023i	0.000627313985906559 + 0.000315595445131410i	0.000334156276310175 - 0.00114533260341699i	-0.000145893211232554 - 0.000395319232106522i	0.000572527918058103 - 0.00104306259604914i	0.00159079113153795 - 0.000966331199355778i	-0.000549934713095846 + 0.00253253070996063i	-0.000495668784070457 + 0.00162181227328336i	-0.000131759431261860 - 0.00152441450853309i	-0.00155722915724340 - 0.000945199437540731i	0.000391654717696271 - 0.000792127097626587i	0.00175051063096811 - 0.000146823954169610i	0.000290932479266475 + 0.00169984547813571i	0.000446862008978202 + 0.000339113715396195i	-0.00120319735488882 - 0.000286462845670956i	-0.00257941916658174 + 0.000463254378512588i	0.00125911692316319 - 0.00146072962845506i	0.00219758921348610 - 0.00103947975556498i	-0.000685639300404875 + 0.00256473620782506i	-0.00114688173130976 + 0.00176151364155597i
[truncated: 206 more columns]
